# Supplementary material for: Neurogliaform cortical interneurons derive from cells in the preoptic area
Source: eLife. 2018 Mar 20;7:e32017. doi: 10.7554/eLife.32017 (PMC5860868; doi:10.7554/eLife.32017)
Supplement: Figure 1—source data 1. [file elife-32017-fig1-data1.xlsx]

## Sheet: Fig. 1C, E, F
E14.5 TFs STUDY (PRESENTED IN FIGURE 1C, E and F)
	image	Coloc zone of POA
		Hmx3-tdTOM+	Hmx3-tdTOM+/Htr3a-GFP+	Htr3a-GFP+	Hmx3-tdTOM+ total	Htr3a-GFP+ total	% of Htr3a-GFP+ that are Hmx3-tdTOM+	% of Hmx3-tdTOM+ that are Htr3a-GFP+
NR2F2/SP8	POA1 left	95	390	60	485	450	0.866667	0.804124
	POA1 right	48	218	50	266	268	0.813433	0.819549
	POA2 right	48	297	61	345	358	0.829609	0.86087
	POA3 right	40	307	52	347	359	0.855153	0.884726
PROX1	POA1 left	23	125	28	148	153	0.816993	0.844595
	POA1 right	14	108	17	122	125	0.864	0.885246
	POA2 right	26	133	14	159	147	0.904762	0.836478
	POA3 left	13	68	9	81	77	0.883117	0.839506
	POA3 right	4	29	4	33	33	0.878788	0.878788
	Total	311	1675	295	1986	1970
	image	Full POA
		Hmx3-tdTOM+	Hmx3-tdTOM+/Htr3a-GFP+	Htr3a-GFP+	Hmx3-tdTOM+ total	Htr3a-GFP+ total	% of Htr3a-GFP+ that are Hmx3-tdTOM+	% of Hmx3-tdTOM+ that are Htr3a-GFP+
NR2F2/SP8	POA1 left	462	395	64	857	459	0.860566	0.46091
	POA1 right	155	221	51	376	272	0.8125	0.587766
	POA2 right	265	301	65	566	366	0.822404	0.531802
	POA3 right	249	314	55	563	369	0.850949	0.557726
PROX1	POA1 left	193	128	31	321	159	0.805031	0.398754
	POA1 right	155	111	22	266	133	0.834586	0.417293
	POA2 right	187	136	17	323	153	0.888889	0.421053
	POA3 left	55	71	11	126	82	0.865854	0.563492
	POA3 right	40	31	6	71	37	0.837838	0.43662
	Total	1761	1708	322	3469	2030
						Brain average	Overlap zone
							% of Htr3a-GFP+ that are Hmx3-tdTOM+	% of Hmx3-tdTOM+ that are Htr3a-GFP+
						b1	0.840273	0.838378
						b2	0.867185	0.848674
						b3	0.872353	0.867673
						Average	0.859937	0.851575
						Brain average	Full POA
							% of Htr3a-GFP+ that are Hmx3-tdTOM+	% of Hmx3-tdTOM+ that are Htr3a-GFP+
						b1	0.828171	0.466181
						b2	0.855647	0.476427
						b3	0.851547	0.519279
						Average	0.845121	0.487296
	image	Overlap zone
		Hmx3-tdTOM+/Htr3a-GFP+	Hmx3-tdTOM+/Htr3a-GFP+/NR2F2+	Hmx3-tdTOM+/Htr3a-GFP+/NR2F2+/SP8+	Hmx3-tdTOM+/Htr3a-GFP+/SP8+	% of NR2F2+ in Hmx3-tdTOM+/Htr3a-GFP+	% of NR2F2+/SP8+ in Hmx3-tdTOM+/Htr3a-GFP+	% of SP8+ in Hmx3-tdTOM+/Htr3a-GFP+	% of NO STAIN in Hmx3-tdTOM+/Htr3a-GFP+
NR2F2/SP8	POA1 left	136	244	4	6	0.625641	0.0102564	0.0153846	0.348718
	POA1 right	58	158	1	1	0.724771	0.00458716	0.00458716	0.266055
	POA2 right	106	188	1	2	0.632997	0.003367	0.00673401	0.356902
	POA3 right	101	205	1	0	0.667752	0.00325733	0	0.32899
	Total	401	795	7	9
					Brain average	Overlap zone
						% of NR2F2+ in Hmx3-tdTOM+/Htr3a-GFP+	% of NR2F2+/SP8+ in Hmx3-tdTOM+/Htr3a-GFP+	% of SP8+ in Hmx3-tdTOM+/Htr3a-GFP+	% of NO STAIN in Hmx3-tdTOM+/Htr3a-GFP+
					b1	0.675206	0.00742178	0.00998589	0.307386
					b2	0.632997	0.003367	0.00673401	0.356902
					b3	0.667752	0.00325733	0	0.32899
					Average	0.658652	0.00468204	0.0055733	0.331093
	image	Overlap zone
		Hmx3-tdTOM+/Htr3a-GFP+	Hmx3-tdTOM+/Htr3a-GFP+/PROX1+	% of PROX1+ in Hmx3-tdTOM+/Htr3a-GFP+
PROX1	POA1 left	125	68	0.544
	POA1 right	108	65	0.601852
	POA2 right	133	66	0.496241
	POA3 left	68	33	0.485294
	POA3 right	29	17	0.586207
	Total	463	249
			Brain average	Overlap zone
				% of PROX1+ in Hmx3-tdTOM+/Htr3a-GFP+
			b1	0.572926
			b2	0.496241
			b3	0.535751
			Average	0.534972
	image	Overlap zone
		Hmx3-tdTOM+/Htr3a-GFP+	Hmx3-tdTOM+/Htr3a-GFP+/NKX2.1+	% of NKX2.1+ in Hmx3-tdTOM+/Htr3a-GFP+
NKX2.1	POA1left	186	19	0.102151
	POA1right	283	47	0.166078
	POA2left	297	51	0.171717
	POA2right	283	42	0.14841
	POA3	97	16	0.164948
	Total	1146	175
			Brain average	Overlap zone
				% of NKX2.1+ in Hmx3-tdTOM+/Htr3a-GFP+
			b1	0.134114
			b2	0.160064
			b3	0.164948
			Average	0.153042

## Sheet: Fig. 1D
E14.5 Htr3a mRNA STUDY (PRESENTED IN FIGURE 1F)
	image	Full POA
		Hmx3-tdTOM+	Hmx3-tdTOM+/Htr3a-GFP+	Htr3a-GFP+	% of Hmx3-tdTOM+ that have Htr3a mRNA	% of Hmx3-tdTOM+/Htr3a-GFP+ that have Htr3amRNA	% of Htr3a-GFP+ that have Htr3a mRNA
	POA1 left	45	39	9	0	0.974359	1
	POA2 right	65	46	10	0.0153846	0.956522	1
	POA3 left	48	35	11	0	0.942857	0.909091
	Total	158	120	30
	image	Full POA
		Hmx3-tdTOM+/Htr3a mRNA+	Hmx3-tdTOM+/Htr3a-GFP+/Htr3a mRNA+	Htr3a-GFP+/Htr3a mRNA+
Htr3a mRNA	POA1 left	0	38	9
	POA2 right	1	44	10
	POA3 left	0	33	10
	Total	1	115	29
