# Supplementary material for: Neurogliaform cortical interneurons derive from cells in the preoptic area
Source: eLife. 2018 Mar 20;7:e32017. doi: 10.7554/eLife.32017 (PMC5860868; doi:10.7554/eLife.32017)
Supplement: Figure 2—source data 1. [file elife-32017-fig2-data1.xlsx]

## Sheet: Fig. 2B- P5
P5 Hmx3 STUDY (PRESENTED IN FIGURE 2B, 3C)
Image name	Overall Htr3a-GFP fraction				Layer 1 Htr3a-GFP fraction				Layer 2/3 Htr3a-GFP fraction				Layer 4 Htr3a-GFP fraction				Layer 5/6 Htr3a-GFP fraction
	GFP+ total	GFP+	GFP+/Hmx3-tdTOM+	Hmx3-tdTOM+	GFP+ total	GFP+	GFP+/Hmx3-tdTOM+	Hmx3-tdTOM+	GFP+ total	GFP+	GFP+/Hmx3-tdTOM+	Hmx3-tdTOM+	GFP+ total	GFP+	GFP+/Hmx3-tdTOM+	Hmx3-tdTOM+	GFP+ total	GFP+	GFP+/Hmx3-tdTOM+	Hmx3-tdTOM+
b1s1right	155	144	11	21	38	33	5	6	54	49	5	7	19	19	0	6	44	43	1	2
b1s2left	129	118	11	14	29	24	5	4	55	52	3	6	12	9	3	1	33	33	0	3
b1s3left	150	141	9	27	33	29	4	8	58	54	4	8	16	15	1	3	43	43	0	8
b1s4right	166	155	11	21	42	37	5	9	72	67	5	5	8	8	0	2	44	43	1	5
b2s1left	197	182	15	16	47	40	7	3	96	89	7	6	10	9	1	3	44	44	0	4
b2s2right	170	156	14	11	32	26	6	4	78	71	7	4	13	12	1	0	47	47	0	3
b2s3left	151	145	6	13	42	39	3	1	68	66	2	6	7	7	0	3	34	33	1	3
Total	1118	1041	77	123	263	228	35	35	481	448	33	42	85	79	6	18	289	286	3	28
Image name	Overall % of Htr3a-GFP fraction		Layer % of Htr3a-GFP fraction									Image name	Overall % of Nkx5.1-tdTOM+ fraction
	GFP+	GFP+/Hmx3-tdTOM+	L1 GFP+	L1 GFP+/Hmx3-tdTOM+	L2/3 GFP+	L2/3 GFP+/Hmx3-tdTOM+	L4 GFP+	L4 GFP+/Hmx3-tdTOM+	L5/6 GFP+	L5/6 GFP+/Hmx3-tdTOM+			GFP+/Nkx5.1-tdTOM+	Nkx5.1-tdTOM+/GFP-
b1s1right	0.929032	0.0709677	0.212903	0.0322581	0.316129	0.0322581	0.122581	0	0.277419	0.00645161		b1s1right	0.34375	0.65625
b1s2left	0.914729	0.0852713	0.186047	0.0387597	0.403101	0.0232558	0.0697674	0.0232558	0.255814	0		b1s2left	0.44	0.56
b1s3left	0.94	0.06	0.193333	0.0266667	0.36	0.0266667	0.1	0.00666667	0.286667	0		b1s3left	0.25	0.75
b1s4right	0.933735	0.0662651	0.222892	0.0301205	0.403614	0.0301205	0.0481928	0	0.259036	0.0060241		b1s4right	0.34375	0.65625
b2s1left	0.923858	0.0761421	0.203046	0.035533	0.451777	0.035533	0.0456853	0.00507614	0.22335	0		b2s1left	0.483871	0.516129
b2s2right	0.917647	0.0823529	0.152941	0.0352941	0.417647	0.0411765	0.0705882	0.00588235	0.276471	0		b2s2right	0.56	0.44
b2s3left	0.960265	0.0397351	0.258278	0.0198675	0.437086	0.013245	0.0463576	0	0.218543	0.00662252		b2s3left	0.315789	0.684211
Brain average	Overall % of Htr3a-GFP fraction		Layer % of Htr3a-GFP fraction
	GFP+	GFP+/Hmx3-tdTOM+	L1 GFP+	L1 GFP+/Hmx3-tdTOM+	L2/3 GFP+	L2/3 GFP+/Hmx3-tdTOM+	L4 GFP+	L4 GFP+/Hmx3-tdTOM+	L5/6 GFP+	L5/6 GFP+/Hmx3-tdTOM+
b1	0.929374	0.070626	0.203794	0.0319512	0.370711	0.0280753	0.0851352	0.00748062	0.269734	0.00311893
b2	0.933923	0.0660767	0.204755	0.0302316	0.435503	0.0299848	0.0542104	0.00365283	0.239455	0.00220751
b3
Average	0.931649	0.0683514	0.204274	0.0310914	0.403107	0.02903	0.0696728	0.00556673	0.254594	0.00266322
Brain average	Overall % of Nkx5.1-tdTOM fraction
	tdTOM+	GFP+/Nkx5.1-tdTOM+
b1	0.655625	0.344375
b2	0.54678	0.45322
b3
Average	0.601202	0.398798

## Sheet: Fig. 2B- P9
P9 Hmx3 STUDY (PRESENTED IN FIGURE 2A, B)
Image name	Overall Htr3a-GFP fraction				Layer 1 Htr3a-GFP fraction				Layer 2/3 Htr3a-GFP fraction				Layer 4 Htr3a-GFP fraction				Layer 5/6 Htr3a-GFP fraction
	GFP+ total	GFP+	GFP+/Hmx3-tdTOM+	Hmx3-tdTOM+	GFP+ total	GFP+	GFP+/Hmx3-tdTOM+	Hmx3-tdTOM+	GFP+ total	GFP+	GFP+/Hmx3-tdTOM+	Hmx3-tdTOM+	GFP+ total	GFP+	GFP+/Hmx3-tdTOM+	Hmx3-tdTOM+	GFP+ total	GFP+	GFP+/Hmx3-tdTOM+	Hmx3-tdTOM+
b1s1right	84	76	8	10	16	13	3	1	36	32	4	5	9	8	1	2	23	23	0	2
b1s2left	151	138	13	18	33	24	9	5	62	59	3	4	20	19	1	4	36	36	0	5
b1s3left	166	148	18	19	35	30	5	3	72	63	9	11	21	18	3	5	38	37	1	0
b2s1left	165	154	11	7	35	30	5	1	72	68	4	4	15	14	1	2	43	42	1	0
b2s2right	134	117	17	12	26	18	8	3	71	63	8	5	8	7	1	4	29	29	0	0
b2s3left	178	160	18	17	50	42	8	5	71	63	8	4	25	24	1	5	32	31	1	3
Total	878	793	85	83	195	157	38	18	384	348	36	33	98	90	8	22	201	198	3	10
Image name	Overall % of Htr3a-GFP fraction		Layer % of Htr3a-GFP fraction									Image name	Overall % of Hmx3-tdTOM+ fraction
	GFP+	GFP+/Hmx3-tdTOM+	L1 GFP+	L1 GFP+/Hmx3-tdTOM+	L2/3 GFP+	L2/3 GFP+/Hmx3-tdTOM+	L4 GFP+	L4 GFP+/Hmx3-tdTOM+	L5/6 GFP+	L5/6 GFP+/Hmx3-tdTOM+			GFP+/Hmx3-tdTOM+	Hmx3-tdTOM+/GFP-
b1s1right	0.904762	0.0952381	0.154762	0.0357143	0.380952	0.047619	0.0952381	0.0119048	0.27381	0		b1s1right	0.444444	0.555556
b1s2left	0.913907	0.0860927	0.15894	0.0596026	0.390728	0.0198675	0.125828	0.00662252	0.238411	0		b1s2left	0.419355	0.580645
b1s3left	0.891566	0.108434	0.180723	0.0301205	0.379518	0.0542169	0.108434	0.0180723	0.222892	0.0060241		b1s3left	0.486486	0.513514
b2s1left	0.933333	0.0666667	0.181818	0.030303	0.412121	0.0242424	0.0848485	0.00606061	0.254545	0.00606061		b2s1left	0.611111	0.388889
b2s2right	0.873134	0.126866	0.134328	0.0597015	0.470149	0.0597015	0.0522388	0.00746269	0.216418	0		b2s2right	0.586207	0.413793
b2s3left	0.898876	0.101124	0.235955	0.0449438	0.353933	0.0449438	0.134831	0.00561798	0.174157	0.00561798		b2s3left	0.514286	0.485714
Brain average	Overall % of Htr3a-GFP fraction		Layer % of Htr3a-GFP fraction
	GFP+	GFP+/Hmx3-tdTOM+	L1 GFP+	L1 GFP+/Hmx3-tdTOM+	L2/3 GFP+	L2/3 GFP+/Hmx3-tdTOM+	L4 GFP+	L4 GFP+/Hmx3-tdTOM+	L5/6 GFP+	L5/6 GFP+/Hmx3-tdTOM+
b1	0.903412	0.0965882	0.164808	0.0418125	0.383733	0.0405678	0.109833	0.0121999	0.245037	0.00200803
b2	0.901781	0.0982186	0.184034	0.0449828	0.412068	0.0429626	0.0906396	0.00638042	0.21504	0.00389286
b3
Average	0.902597	0.0974034	0.174421	0.0433976	0.3979	0.0417652	0.100236	0.00929014	0.230039	0.00295045
Brain average	Overall % of Hmx3-tdTOM fraction
	tdTOM+	GFP+/Hmx3-tdTOM+
b1	0.549905	0.450095
b2	0.429465	0.570535
b3
Average	0.489685	0.510315

## Sheet: Fig. 2B- P21
P21 LAYERING (PRESENTED IN FIGURE 2B) AND NPY STUDY (PRESENTED IN FIGURE 5E, F)
Image name	Overall main fractions					Layer 1 main fractions				NPY analysis		Layer 2/3 main fractions				NPY analysis		Layer 4 main fractions				NPY analysis		Layer 5/6 main fractions				NPY analysis
	GFP+ total	GFP+	GFP+/tdTOM+	tdTOM+	GFP+/NPY+ total	GFP+ total	GFP+	GFP+/tdTOM+	tdTOM+	GFP+/tdTOM+/NPY+	GFP+/NPY+	GFP+ total	GFP+	GFP+/tdTOM+	tdTOM+	GFP+/tdTOM+/NPY+	GFP+/NPY+	GFP+ total	GFP+	GFP+/tdTOM+	tdTOM+	GFP+/tdTOM+/NPY+	GFP+/NPY+	GFP+ total	GFP+	GFP+/tdTOM+	tdTOM+	GFP+/tdTOM+/NPY+	GFP+/NPY+
b1s1left	58	49	9	17	19	11	9	2	4	0	1	28	22	6	5	5	4	3	3	0	3	0	2	16	15	1	5	1	6
b1s2right	80	66	14	11	19	16	10	6	0	0	2	40	34	6	5	4	9	8	7	1	3	1	0	16	15	1	3	1	2
b1s3right	76	62	14	31	22	16	12	4	3	0	1	38	31	7	16	7	8	5	4	1	9	1	0	17	15	2	3	1	4
b2s1right	121	97	24	18	14	25	14	11	3	0	0	69	60	9	5	4	4	13	9	4	7	4	0	14	14	0	3	0	2
b2s2left	151	122	29	17	36	26	14	12	1	0	0	82	68	14	9	9	19	12	11	1	5	1	2	31	29	2	2	0	5
b2s2right	126	101	25	12	32	26	18	8	1	1	2	65	54	11	3	4	10	17	13	4	2	4	3	18	16	2	6	2	6
b2s3right	109	93	16	11	23	30	24	6	3	1	1	53	45	8	7	8	9	13	11	2	0	2	0	13	13	0	1	0	2
b3s1left	110	97	13	26	29	35	30	5	3	1	6	48	41	7	8	5	12	8	8	0	7	0	0	19	18	1	8	1	4
b3s2right	118	102	16	12	30	41	30	11	1	1	1	45	43	2	7	2	19	11	9	2	2	2	1	21	20	1	2	0	4
b3s3left	97	86	11	11	24	18	15	3	4	0	2	52	46	6	2	6	7	9	9	0	5	0	3	18	16	2	0	2	4
Total	1046	875	171	166	248	244	176	68	23	4	16	520	444	76	67	54	101	99	84	15	43	15	11	183	171	12	33	8	39
				Image name	Layer distribution % of NPY in Htr3a-GFP/Hmx3-tdTOM fraction								Overall % of NPY in Htr3a-GFP/Hmx3-tdTOM fraction	Layer distribution of Htr3a-GFP and Htr3a-GFP/Hmx3-tdTOM fractions
					L1 GFP+/tdTOM+	L1 GFP+/tdTOM+/NPY+	L2/3 GFP+/tdTOM+	L2/3 GFP+/tdTOM+/NPY+	L4 GFP+/tdTOM+	L4 GFP+/tdTOM+/NPY+	L5/6 GFP+/tdTOM+	L5/6 GFP+/tdTOM+/NPY+		L1 GFP+	L1 GFP+/tdTOM+	L2/3 GFP+	L2/3 GFP+/tdTOM+	L4 GFP+	L4 GFP+/tdTOM+	L5/6 GFP+	L5/6 GFP+/tdTOM+
				b1s1left	0.222222	0	0.111111	0.555556	0	0	0	0.111111	0.666667	0.155172	0.0344828	0.37931	0.103448	0.0517241	0	0.258621	0.0172414
				b1s2right	0.428571	0	0.142857	0.285714	0	0.0714286	0	0.0714286	0.428571	0.125	0.075	0.425	0.075	0.0875	0.0125	0.1875	0.0125
				b1s3right	0.285714	0	0	0.5	0	0.0714286	0.0714286	0.0714286	0.642857	0.157895	0.0526316	0.407895	0.0921053	0.0526316	0.0131579	0.197368	0.0263158
				b2s1right	0.458333	0	0.208333	0.166667	0	0.166667	0	0	0.333333	0.115702	0.0909091	0.495868	0.0743802	0.0743802	0.0330579	0.115702	0
				b2s2left	0.413793	0	0.172414	0.310345	0	0.0344828	0.0689655	0	0.344828	0.0927152	0.0794702	0.450331	0.0927152	0.0728477	0.00662252	0.192053	0.013245
				b2s2right	0.28	0.04	0.28	0.16	0	0.16	0	0.08	0.44	0.142857	0.0634921	0.428571	0.0873016	0.103175	0.031746	0.126984	0.015873
				b2s3right	0.3125	0.0625	0	0.5	0	0.125	0	0	0.6875	0.220183	0.0550459	0.412844	0.0733945	0.100917	0.0183486	0.119266	0
				b3s1left	0.307692	0.0769231	0.153846	0.384615	0	0	0	0.0769231	0.538462	0.272727	0.0454545	0.372727	0.0636364	0.0727273	0	0.163636	0.00909091
				b3s2right	0.625	0.0625	0	0.125	0	0.125	0.0625	0	0.3125	0.254237	0.0932203	0.364407	0.0169492	0.0762712	0.0169492	0.169492	0.00847458
				b3s3left	0.272727	0	0	0.545455	0	0	0	0.181818	0.727273	0.154639	0.0309278	0.474227	0.0618557	0.0927835	0	0.164948	0.0206186
				Brain average	Layer distribution % of NPY in Htr3a-GFP/Hmx3-tdTOM fraction								Overall % of NPY in Htr3a-GFP/Hmx3-tdTOM fraction
					L1 GFP+/tdTOM+	L1 GFP+/tdTOM+/NPY+	L2/3 GFP+/tdTOM+	L2/3 GFP+/tdTOM+/NPY+	L4 GFP+/tdTOM+	L4 GFP+/tdTOM+/NPY+	L5/6 GFP+/tdTOM+	L5/6 GFP+/tdTOM+/NPY+
				b1	0.312169	0	0.0846561	0.44709	0	0.047619	0.0238095	0.0846561	0.579365
				b2	0.366157	0.025625	0.165187	0.284253	0	0.121537	0.0172414	0.02	0.451415
				b3	0.401807	0.0464744	0.0512821	0.35169	0	0.0416667	0.0208333	0.0862471	0.526078
				Average	0.360044	0.0240331	0.100375	0.361011	0	0.0702744	0.0206281	0.0636344	0.518953
				Image name	Layer distribution % of Hmx3-tdTOM in NPY/Htr3a-GFP fraction								Overall %GFP/Hmx3-tdTOM in NPY/GFP fraction
					L1 GFP+/NPY+	L1 GFP+/tdTOM+/NPY+	L2/3 GFP+/NPY+	L2/3 GFP+/tdTOM+/NPY+	L4 GFP+/NPY+	L4 GFP+/tdTOM+/NPY+	L5/6 GFP+/NPY+	L5/6 GFP+/tdTOM+/NPY+
				b1s1left	0.0526316	0	0.210526	0.263158	0.105263	0	0.315789	0.0526316	0.315789
				b1s2right	0.105263	0	0.473684	0.210526	0	0.0526316	0.105263	0.0526316	0.315789
				b1s3right	0.0454545	0	0.363636	0.318182	0	0.0454545	0.181818	0.0454545	0.409091
				b2s1right	0	0	0.285714	0.285714	0	0.285714	0.142857	0	0.571429
				b2s2left	0	0	0.527778	0.25	0.0555556	0.0277778	0.138889	0	0.277778
				b2s2right	0.0625	0.03125	0.3125	0.125	0.09375	0.125	0.1875	0.0625	0.34375
				b2s3right	0.0434783	0.0434783	0.391304	0.347826	0	0.0869565	0.0869565	0	0.478261
				b3s1left	0.206897	0.0344828	0.413793	0.172414	0	0	0.137931	0.0344828	0.241379
				b3s2right	0.0333333	0.0333333	0.633333	0.0666667	0.0333333	0.0666667	0.133333	0	0.166667
				b3s3left	0.0833333	0	0.291667	0.25	0.125	0	0.166667	0.0833333	0.333333
				Brain average	Layer distribution % of Hmx3-tdTOM in NPY/Htr3a-GFP fraction								Overall %GFP/Hmx3-tdTOM in NPY/GFP fraction
					L1 GFP+/NPY+	L1 GFP+/tdTOM+/NPY+	L2/3 GFP+/NPY+	L2/3 GFP+/tdTOM+/NPY+	L4 GFP+/NPY+	L4 GFP+/tdTOM+/NPY+	L5/6 GFP+/NPY+	L5/6 GFP+/tdTOM+/NPY+
				b1	0.0677831	0	0.349282	0.263955	0.0350877	0.0326954	0.200957	0.0502392	0.34689
				b2	0.0264946	0.0186821	0.379324	0.252135	0.0373264	0.131362	0.139051	0.015625	0.417804
				b3	0.107854	0.0226054	0.446264	0.163027	0.0527778	0.0222222	0.145977	0.039272	0.247126
				Average	0.0673774	0.0137625	0.391624	0.226372	0.0417306	0.0620932	0.161995	0.0350454	0.337274
P21 LAYERING (PRESENTED IN FIGURE 2B) AND RELN STUDY (PRESENTED IN FIGURE 5C, D)
Image name	Overall main fractions					Layer 1 main fractions				RELN analysis		Layer 2/3 main fractions				RELN analysis		Layer 4 main fractions				RELN analysis		Layer 5/6 main fractions				RELN analysis
	GFP+ total	GFP+	GFP+/tdTOM+	tdTOM+	GFP+/RELN+ total	GFP+ total	GFP+	GFP+/tdTOM+	tdTOM+	GFP+/tdTOM+/RELN+	GFP+/RELN+	GFP+ total	GFP+	GFP+/tdTOM+	tdTOM+	GFP+/tdTOM+/RELN+	GFP+/RELN+	GFP+ total	GFP+	GFP+/tdTOM+	tdTOM+	GFP+/tdTOM+/RELN+	GFP+/RELN+	GFP+ total	GFP+	GFP+/tdTOM+	tdTOM+	GFP+/tdTOM+/RELN+	GFP+/RELN+
b1s1left	74	63	11	12	22	15	10	5	0	5	8	39	35	4	8	3	3	9	7	2	2	1	2	11	11	0	2	0	0
b1s2right	100	82	18	13	26	30	21	9	1	4	11	43	37	6	5	3	4	15	12	3	4	2	1	12	12	0	3	0	1
b1s3left	109	90	19	12	20	24	14	10	0	7	5	62	54	8	4	5	2	7	6	1	7	0	1	16	16	0	1	0	0
b2s1left	70	56	14	17	21	13	9	4	1	4	6	40	33	7	5	6	3	4	4	0	5	0	1	13	10	3	6	1	0
b2s2right	122	99	23	25	36	24	14	10	7	10	6	60	53	7	9	7	10	15	14	1	8	1	1	23	18	5	1	1	0
b2s3right	107	92	15	15	40	38	27	11	4	11	19	34	32	2	3	1	3	15	13	2	1	1	1	20	20	0	7	0	4
b3s1right	126	109	17	19	36	27	19	8	7	8	16	67	63	4	9	1	10	13	12	1	3	0	0	19	15	4	0	0	1
b3s2left	114	91	23	31	44	31	22	9	4	6	17	56	44	12	10	8	10	10	8	2	8	1	1	17	17	0	9	0	1
b3s3right	115	96	19	30	26	14	11	3	5	3	5	66	56	10	9	3	12	15	13	2	8	2	1	20	16	4	8	0	0
Total	937	778	159	174	271	216	147	69	29	58	93	467	407	60	62	37	57	103	89	14	46	8	9	151	135	16	37	2	7
				Image name	Layer distribution % of RELN in Htr3a-GFP/Hmx3-tdTOM fraction								Overall % of RELN in Htr3a-GFP/Hmx3-tdTOM fraction	Layer distribution of Htr3a-GFP and Htr3a-GFP/Hmx3-tdTOM fractions
					L1 GFP+/tdTOM+	L1 GFP+/tdTOM+/RELN+	L2/3 GFP+/tdTOM+	L2/3 GFP+/tdTOM+/RELN+	L4 GFP+/tdTOM+	L4 GFP+/tdTOM+/RELN+	L5/6 GFP+/tdTOM+	L5/6 GFP+/tdTOM+/RELN+		L1 GFP+	L1 GFP+/tdTOM+	L2/3 GFP+	L2/3 GFP+/tdTOM+	L4 GFP+	L4 GFP+/tdTOM+	L5/6 GFP+	L5/6 GFP+/tdTOM+
				b1s1left	0	0.454545	0.0909091	0.272727	0.0909091	0.0909091	0	0	0.818182	0.135135	0.0675676	0.472973	0.0540541	0.0945946	0.027027	0.148649	0
				b1s2right	0.277778	0.222222	0.166667	0.166667	0.0555556	0.111111	0	0	0.5	0.21	0.09	0.37	0.06	0.12	0.03	0.12	0
				b1s3left	0.157895	0.368421	0.157895	0.263158	0.0526316	0	0	0	0.631579	0.12844	0.0917431	0.495413	0.0733945	0.0550459	0.00917431	0.146789	0
				b2s1left	0	0.285714	0.0714286	0.428571	0	0	0.142857	0.0714286	0.785714	0.128571	0.0571429	0.471429	0.1	0.0571429	0	0.142857	0.0428571
				b2s2right	0	0.434783	0	0.304348	0	0.0434783	0.173913	0.0434783	0.826087	0.114754	0.0819672	0.434426	0.057377	0.114754	0.00819672	0.147541	0.0409836
				b2s3right	0	0.733333	0.0666667	0.0666667	0.0666667	0.0666667	0	0	0.866667	0.252336	0.102804	0.299065	0.0186916	0.121495	0.0186916	0.186916	0
				b3s1right	0	0.470588	0.176471	0.0588235	0.0588235	0	0.235294	0	0.529412	0.150794	0.0634921	0.5	0.031746	0.0952381	0.00793651	0.119048	0.031746
				b3s2left	0.130435	0.26087	0.173913	0.347826	0.0434783	0.0434783	0	0	0.652174	0.192982	0.0789474	0.385965	0.105263	0.0701754	0.0175439	0.149123	0
				b3s3right	0	0.157895	0.368421	0.157895	0	0.105263	0.210526	0	0.421053	0.0956522	0.026087	0.486957	0.0869565	0.113043	0.0173913	0.13913	0.0347826
				Brain average	Layer distribution % of RELN in Htr3a-GFP/Hmx3-tdTOM fraction								Overall % of RELN in Htr3a-GFP/Hmx3-tdTOM fraction
					L1 GFP+/tdTOM+	L1 GFP+/tdTOM+/RELN+	L2/3 GFP+/tdTOM+	L2/3 GFP+/tdTOM+/RELN+	L4 GFP+/tdTOM+	L4 GFP+/tdTOM+/RELN+	L5/6 GFP+/tdTOM+	L5/6 GFP+/tdTOM+/RELN+
				b1	0.145224	0.348396	0.13849	0.234184	0.0663654	0.0673401	0	0	0.64992
				b2	0	0.48461	0.0460317	0.266529	0.0222222	0.036715	0.10559	0.0383023	0.826156
				b3	0.0434783	0.296451	0.239602	0.188181	0.0341006	0.0495805	0.148607	0	0.534213
				Average	0.0629008	0.376486	0.141374	0.229631	0.0408961	0.0512118	0.0847323	0.0127674	0.670096
				Image name	Layer distribution % of Hmx3-tdTOM in RELN/Htr3a-GFP fraction								Overall %GFP/Hmx3-tdTOM in RELN/GFP fraction
					L1 GFP+/RELN+	L1 GFP+/tdTOM+/RELN+	L2/3 GFP+/RELN+	L2/3 GFP+/tdTOM+/RELN+	RELN+	L4 GFP+/tdTOM+/RELN+	L5/6 GFP+/RELN+	L5/6 GFP+/tdTOM+/RELN+
				b1s1left	0.363636	0.227273	0.136364	0.136364	0.0909091	0.0454545	0	0	0.409091
				b1s2right	0.423077	0.153846	0.153846	0.115385	0.0384615	0.0769231	0.0384615	0	0.346154
				b1s3left	0.25	0.35	0.1	0.25	0.05	0	0	0	0.6
				b2s1left	0.285714	0.190476	0.142857	0.285714	0.047619	0	0	0.047619	0.52381
				b2s2right	0.166667	0.277778	0.277778	0.194444	0.0277778	0.0277778	0	0.0277778	0.527778
				b2s3right	0.475	0.275	0.075	0.025	0.025	0.025	0.1	0	0.325
				b3s1right	0.444444	0.222222	0.277778	0.0277778	0	0	0.0277778	0	0.25
				b3s2left	0.386364	0.136364	0.227273	0.181818	0.0227273	0.0227273	0.0227273	0	0.340909
				b3s3right	0.192308	0.115385	0.461538	0.115385	0.0384615	0.0769231	0	0	0.307692
				Brain average	Layer distribution % of Hmx3-tdTOM in RELN/Htr3a-GFP fraction								Overall %GFP/Hmx3-tdTOM in RELN/GFP fraction	Layer distribution of Htr3a-GFP and Htr3a-GFP/Hmx3-tdTOM fractions MERGE STUDY
					L1 GFP+/RELN+	L1 GFP+/tdTOM+/RELN+	L2/3 GFP+/RELN+	L2/3 GFP+/tdTOM+/RELN+	RELN+	L4 GFP+/tdTOM+/RELN+	L5/6 GFP+/RELN+	L5/6 GFP+/tdTOM+/RELN+		L1 GFP+	L1 GFP+/tdTOM+	L2/3 GFP+	L2/3 GFP+/tdTOM+	L4 GFP+	L4 GFP+/tdTOM+	L5/6 GFP+	L5/6 GFP+/tdTOM+
				b1	0.345571	0.243706	0.13007	0.167249	0.0597902	0.0407925	0.0128205	0	0.451748	0.15194	0.0685708	0.425098	0.0763337	0.076916	0.0153099	0.176488	0.00934286
				b2	0.309127	0.247751	0.165212	0.168386	0.0334656	0.0175926	0.0333333	0.0251323	0.458862	0.152446	0.075833	0.427505	0.07198	0.0921017	0.0166662	0.147331	0.016137
				b3	0.341039	0.15799	0.322196	0.108327	0.0203963	0.0332168	0.016835	0	0.299534	0.186839	0.0563549	0.430714	0.0610678	0.0867065	0.00997014	0.150896	0.0174521
				Average	0.331912	0.216483	0.205826	0.147988	0.037884	0.030534	0.0209963	0.00837743	0.403381	0.163742	0.0669196	0.427772	0.0697938	0.0852414	0.0139821	0.158238	0.0143106
														FIGURE 2B
P21 RELN/NPY OVERLAP STUDY (PRESENTED IN FIGURE 5H)
Image name	Main fractions				Htr3a-GFP fraction			Htr3a-GFP/Hmx3-tdTOM fraction			Hmx3-tdTOM fraction
	GFP+ total	GFP+	GFP+/tdTOM+	tdTOM+	GFP+/RELN+	GFP+/NPY+	GFP+/RELN+/NPY+	GFP+/tdTOM+/RELN+	GFP+/tdTOM+/NPY+	GFP+/tdTOM+/RELN+/NPY+	tdTOM+/RELN+	tdTOM+/NPY+	tdTOM+/RELN+/NPY+
b1niv1left	237	203	34	29	35	28	16	11	2	12	0	2	0
b1niv1right	126	109	17	20	21	22	6	14	2	3	0	1	0
b1niv2left	283	230	53	43	32	39	17	7	2	14	0	2	0
b1niv3left	217	188	29	14	46	20	9	6	2	4	0	0	0
b2niv1left	193	164	29	35	33	22	15	23	4	6	0	0	1
b2niv2right	147	122	25	25	21	9	4	16	4	5	0	0	0
b2niv3left	195	168	27	20	48	11	11	17	0	6	0	0	0
b2niv3right	135	117	18	26	23	23	3	10	1	1	0	0	0
Total	1533	1301	232	212	259	174	81	104	17	51	0	5	1
			% of markers expressed in fractions	Image name	Htr3a-GFP fraction			Htr3a-GFP/Hmx3-tdTOM fraction			GFP fraction undefined	GFP/tdTOM fraction undefined	Overall % of RELN in Htr3a-GFP/Hmx3-tdTOM fraction	Overall % of NPY in Htr3a-GFP/Hmx3-tdTOM fraction	Overall %GFP/tdTOM in RELN/GFP fraction	Overall %GFP/tdTOM in NPY/GFP fraction
					GFP+/RELN+	GFP+/NPY+	GFP+/RELN+/NPY+	GFP+/tdTOM+/RELN+	GFP+/tdTOM+/NPY+	GFP+/tdTOM+/RELN+/NPY+
				b1niv1left	0.172414	0.137931	0.0788177	0.323529	0.0588235	0.352941	0.610837	0.588235	0.676471	0.411765	0.310811	0.241379
				b1niv1right	0.192661	0.201835	0.0550459	0.823529	0.117647	0.176471	0.550459	0.705882	1	0.294118	0.386364	0.151515
				b1niv2left	0.13913	0.169565	0.073913	0.132075	0.0377358	0.264151	0.617391	0.698113	0.396226	0.301887	0.3	0.222222
				b1niv3left	0.244681	0.106383	0.0478723	0.206897	0.0689655	0.137931	0.601064	0.793103	0.344828	0.206897	0.153846	0.171429
				b2niv1left	0.20122	0.134146	0.0914634	0.793103	0.137931	0.206897	0.573171	0.655172	1	0.344828	0.376623	0.212766
				b2niv2right	0.172131	0.0737705	0.0327869	0.64	0.16	0.2	0.721311	0.64	0.84	0.36	0.456522	0.409091
				b2niv3left	0.285714	0.0654762	0.0654762	0.62963	0	0.222222	0.583333	0.777778	0.851852	0.222222	0.280488	0.214286
				b2niv3right	0.196581	0.196581	0.025641	0.555556	0.0555556	0.0555556	0.581197	0.888889	0.611111	0.111111	0.297297	0.0714286
				Brain average	Htr3a-GFP fraction			Htr3a-GFP/Hmx3-tdTOM fraction			GFP fraction undefined	GFP/tdTOM fraction undefined	Overall % of RELN in Htr3a-GFP/Hmx3-tdTOM fraction	Overall % of NPY in Htr3a-GFP/Hmx3-tdTOM fraction	Overall % of GFP/tdTOM in RELN/GFP fraction MERGE STUDY	Overall % of GFP/tdTOM in NPY/GFP fraction MERGE STUDY
					GFP+/RELN+	GFP+/NPY+	GFP+/RELN+/NPY+	GFP+/tdTOM+/RELN+	GFP+/tdTOM+/NPY+	GFP+/tdTOM+/RELN+/NPY+
				b1	0.187221	0.153929	0.0639122	0.371508	0.070793	0.232873	0.594938	0.696334	0.604381	0.303666	0.358038	0.261031
				b2	0.213912	0.117494	0.0538419	0.654572	0.0883716	0.171169	0.614753	0.74046	0.825741	0.25954	0.398217	0.322349
				b3											0.299534	0.247126
				Average	0.200566	0.135711	0.0588771	0.51304	0.0795823	0.202021	0.604845	0.718397	0.715061	0.281603	0.351929	0.276835									1
															Overall % of RELN in Htr3a-GFP/Hmx3-tdTOM fraction MERGE STUDY	Overall % of NPY in Htr3a-GFP/Hmx3-tdTOM fraction MERGE STUDY
															0.623898	0.421823
															0.825919	0.355478
															0.534213	0.526078
															0.661343	0.43446

## Sheet: Fig. 2E
P21 NEUN STUDY (PRESENTED IN FIGURE 2E)
Image name	Hmx3-tdTOM fraction				Analysis of NEUN
	tdTOM+ total	tdTOM+	tdTOM+ astrocytic shape	Hmx3-tdTOM+/Htr3a-GFP+	tdTOM+/GFP+ that are NEUN+	tdTOM+ that are NEUN+
b1s1left	86	74	12	27	27	2
b1s1right	37	34	3	23	23	0
b1s2left	44	38	6	22	21	0
b1s2right	58	48	10	25	24	2
b1s3right	67	58	9	25	24	2
b1s3left	90	76	14	26	24	2
b2s1left	108	80	28	42	39	2
b2s1right	76	69	7	39	38	3
b2s2left	65	60	5	37	36	3
b2s2right	80	68	12	38	35	5
b2s3right	69	65	4	35	34	3
b2s3left	109	88	21	33	32	4
Total	889	758	131	372	357	28
		% of marker expressed in fraction	Image name	Hmx3-tdTOM fraction	Analysis of NEUN
				% of tdTOM+ that are GFP	tdTOM+/GFP+ that are NEUN+	tdTOM+ that are NEUN+
			b1s1left	0.364865	1	0.027027
			b1s1right	0.676471	1	0
			b1s2left	0.578947	0.954545	0
			b1s2right	0.520833	0.96	0.0416667
			b1s3right	0.431034	0.96	0.0344828
			b1s3left	0.342105	0.923077	0.0263158
			b2s1left	0.525	0.928571	0.025
			b2s1right	0.565217	0.974359	0.0434783
			b2s2left	0.616667	0.972973	0.05
			b2s2right	0.558824	0.921053	0.0735294
			b2s3right	0.538462	0.971429	0.0461538
			b2s3left	0.375	0.969697	0.0454545
			Brain average	Hmx3-tdTOM fraction	Analysis of NEUN
				tdTOM+/GFP+	tdTOM+/GFP+ that are NEUN+	tdTOM+ that are NEUN+
			b1	0.485709	0.96627	0.021582
			b2	0.525	0.956347	0.0472693
			Average	0.505355	0.961309	0.0344257
