# Supplementary material for: Neurogliaform cortical interneurons derive from cells in the preoptic area
Source: eLife. 2018 Mar 20;7:e32017. doi: 10.7554/eLife.32017 (PMC5860868; doi:10.7554/eLife.32017)
Supplement: Figure 3—source data 1. [file elife-32017-fig3-data1.xlsx]

## Sheet: P5 Dbx1_Htr3aGFP - Fig.3C
P5 DBX1 STUDY (PRESENTED IN FIGURE 3C)
Image name	Overall Htr3a-GFP fraction				Layer 1 Htr3a-GFP fraction				Layer 2/3 Htr3a-GFP fraction				Layer 4 Htr3a-GFP fraction				Layer 5/6 Htr3a-GFP fraction
	GFP+ total	GFP+	GFP+/Dbx1-tdTOM+	Dbx1-tdTOM+	GFP+ total	GFP+	GFP+/Dbx1-tdTOM+	Dbx1-tdTOM+	GFP+ total	GFP+	GFP+/Dbx1-tdTOM+	Dbx1-tdTOM+	GFP+ total	GFP+	GFP+/Dbx1-tdTOM+	Dbx1-tdTOM+	GFP+ total	GFP+	GFP+/Dbx1-tdTOM+	Dbx1-tdTOM+
b1s1right	1172	1157	15	74	398	390	8	19	480	477	3	8	128	127	1	13	166	163	3	34
b1s2right	777	764	13	68	301	296	5	13	278	276	2	14	95	92	3	19	103	100	3	22
b1s3left	775	770	5	56	239	236	3	6	267	266	1	10	152	151	1	16	117	117	0	24
b2s1left	464	460	4	62	193	192	1	14	182	180	2	12	35	35	0	8	54	53	1	28
b2s2right	579	562	17	54	227	225	2	9	234	233	1	11	42	38	4	8	76	66	10	26
b2s3left	455	446	9	31	143	140	3	2	207	206	1	12	45	43	2	4	60	57	3	13
b3s2left	712	703	9	60	231	225	6	10	309	309	0	14	79	78	1	11	93	91	2	25
b3s3right	807	798	9	58	246	243	3	25	343	342	1	13	123	120	3	12	95	93	2	8
Total	5741	5660	81	463	1978	1947	31	98	2300	2289	11	94	699	684	15	91	764	740	24	180
Image name	Overall % of Htr3a-GFP fraction		Layer % of Htr3a-GFP fraction
	GFP+	GFP+/Dbx1-tdTOM+	L1 GFP+	L1 GFP+/Dbx1-tdTOM+	L2/3 GFP+	L2/3 GFP+/Dbx1-tdTOM+	L4 GFP+	L4 GFP+/Dbx1-tdTOM+	L5/6 GFP+	L5/6 GFP+/Dbx1-tdTOM+
b1s1right	0.987201	0.0127986	0.332765	0.00682594	0.406997	0.00255973	0.108362	0.000853242	0.139078	0.00255973
b1s2right	0.983269	0.016731	0.380952	0.00643501	0.355212	0.002574	0.118404	0.003861	0.1287	0.003861
b1s3left	0.993548	0.00645161	0.304516	0.00387097	0.343226	0.00129032	0.194839	0.00129032	0.150968	0
b2s1left	0.991379	0.00862069	0.413793	0.00215517	0.387931	0.00431034	0.075431	0	0.114224	0.00215517
b2s2right	0.970639	0.029361	0.388601	0.00345423	0.402418	0.00172712	0.0656304	0.00690846	0.11399	0.0172712
b2s3left	0.98022	0.0197802	0.307692	0.00659341	0.452747	0.0021978	0.0945055	0.0043956	0.125275	0.00659341
b3s2left	0.98736	0.0126404	0.316011	0.00842697	0.433989	0	0.109551	0.00140449	0.127809	0.00280899
b3s3right	0.988848	0.0111524	0.301115	0.00371747	0.423792	0.00123916	0.148699	0.00371747	0.115242	0.00247831
Brain average	Overall % of Htr3a-GFP fraction		Layer % of Htr3a-GFP fraction
	GFP+	GFP+/Dbx1-tdTOM+	L1 GFP+	L1 GFP+/Dbx1-tdTOM+	L2/3 GFP+	L2/3 GFP+/Dbx1-tdTOM+	L4 GFP+	L4 GFP+/Dbx1-tdTOM+	L5/6 GFP+	L5/6 GFP+/Dbx1-tdTOM+
b1	0.988006	0.0119938	0.339411	0.00571064	0.368478	0.00214135	0.140535	0.00200152	0.139582	0.00214024
b2	0.980746	0.019254	0.370029	0.0040676	0.414365	0.00274509	0.0785223	0.00376802	0.11783	0.00867325
b3	0.988104	0.0118964	0.308563	0.00607222	0.42889	0.000619579	0.129125	0.00256098	0.121525	0.00264365
Average	0.985619	0.0143814	0.339334	0.00528349	0.403911	0.00183534	0.116061	0.00277684	0.126312	0.00448571

## Sheet: P21 Dbx1_Htr3aGFP - Fig.3C
P21 DBX1 STUDY (PRESENTED IN FIGURE 3C)
Image name	Overall Htr3a-GFP fraction				Layer 1 Htr3a-GFP fraction				Layer 2/3 Htr3a-GFP fraction				Layer 4 Htr3a-GFP fraction				Layer 5/6 Htr3a-GFP fraction
	GFP+ total	GFP+	GFP+/Dbx1-tdTOM+	Dbx1-tdTOM+	GFP+ total	GFP+	GFP+/Dbx1-tdTOM+	Dbx1-tdTOM+	GFP+ total	GFP+	GFP+/Dbx1-tdTOM+	Dbx1-tdTOM+	GFP+ total	GFP+	GFP+/Dbx1-tdTOM+	Dbx1-tdTOM+	GFP+ total	GFP+	GFP+/Dbx1-tdTOM+	Dbx1-tdTOM+
b1s1left	110	110	0	18	26	26	0	0	57	57	0	5	9	9	0	8	18	18	0	5
b1s1right	161	159	2	32	30	28	2	1	80	80	0	7	16	16	0	11	35	35	0	13
b1s2left	175	175	0	22	33	33	0	1	82	82	0	2	20	20	0	4	40	40	0	15
b1s2right	163	159	4	16	29	28	1	0	80	77	3	3	22	22	0	4	32	32	0	9
b1s3left	171	169	2	16	45	45	0	0	76	74	2	2	12	12	0	1	38	38	0	13
b1s3right	170	167	3	23	43	40	3	1	71	71	0	4	25	25	0	5	31	31	0	13
b2s1left	137	137	0	8	38	38	0	0	60	60	0	2	17	17	0	4	22	22	0	2
b2s1right	180	177	3	18	39	36	3	0	93	93	0	5	23	23	0	3	25	25	0	10
b2s2left	152	152	0	15	21	21	0	0	89	89	0	3	14	14	0	4	28	28	0	8
b2s2right	134	133	1	10	24	24	0	0	78	77	1	2	14	14	0	3	18	18	0	5
b2s3right	133	132	1	18	45	45	0	1	52	51	1	1	17	17	0	2	19	19	0	14
b2s3left	127	126	1	14	32	32	0	0	56	55	1	5	14	14	0	2	25	25	0	7
b3s1right	187	186	1	10	49	48	1	0	96	96	0	4	22	22	0	3	20	20	0	3
b3s2left	130	129	1	10	30	29	1	0	62	62	0	3	18	18	0	5	20	20	0	2
b3s2right	165	165	0	15	31	31	0	0	87	87	0	4	26	26	0	5	21	21	0	6
b3s3left	116	115	1	7	35	34	1	0	52	52	0	3	18	18	0	1	11	11	0	3
b3s3right	140	140	0	9	35	35	0	0	59	59	0	3	21	21	0	1	25	25	0	5
Total	2551	2531	20	261	585	573	12	4	1230	1222	8	58	308	308	0	66	428	428	0	133
Image name	Overall % of Htr3a-GFP fraction		Layer % of Htr3a-GFP fraction
	GFP+	GFP+/Dbx1-tdTOM+	L1 GFP+	L1 GFP+/Dbx1-tdTOM+	L2/3 GFP+	L2/3 GFP+/Dbx1-tdTOM+	L4 GFP+	L4 GFP+/Dbx1-tdTOM+	L5/6 GFP+	L5/6 GFP+/Dbx1-tdTOM+
b1s1left	1	0	0.236364	0	0.518182	0	0.0818182	0	0.163636	0
b1s1right	0.987578	0.0124224	0.173913	0.0124224	0.496894	0	0.0993789	0	0.217391	0
b1s2left	1	0	0.188571	0	0.468571	0	0.114286	0	0.228571	0
b1s2right	0.97546	0.0245399	0.171779	0.00613497	0.472393	0.0184049	0.134969	0	0.196319	0
b1s3left	0.988304	0.0116959	0.263158	0	0.432749	0.0116959	0.0701754	0	0.222222	0
b1s3right	0.982353	0.0176471	0.235294	0.0176471	0.417647	0	0.147059	0	0.182353	0
b2s1left	1	0	0.277372	0	0.437956	0	0.124088	0	0.160584	0
b2s1right	0.983333	0.0166667	0.2	0.0166667	0.516667	0	0.127778	0	0.138889	0
b2s2left	1	0	0.138158	0	0.585526	0	0.0921053	0	0.184211	0
b2s2right	0.992537	0.00746269	0.179104	0	0.574627	0.00746269	0.104478	0	0.134328	0
b2s3right	0.992481	0.0075188	0.338346	0	0.383459	0.0075188	0.12782	0	0.142857	0
b2s3left	0.992126	0.00787402	0.251969	0	0.433071	0.00787402	0.110236	0	0.19685	0
b3s1right	0.994652	0.00534759	0.256684	0.00534759	0.513369	0	0.117647	0	0.106952	0
b3s2left	0.992308	0.00769231	0.223077	0.00769231	0.476923	0	0.138462	0	0.153846	0
b3s2right	1	0	0.187879	0	0.527273	0	0.157576	0	0.127273	0
b3s3left	0.991379	0.00862069	0.293103	0.00862069	0.448276	0	0.155172	0	0.0948276	0
b3s3right	1	0	0.25	0	0.421429	0	0.15	0	0.178571	0
Brain average	Overall % of Htr3a-GFP fraction		Layer % of Htr3a-GFP fraction
	GFP+	GFP+/Dbx1-tdTOM+	L1 GFP+	L1 GFP+/Dbx1-tdTOM+	L2/3 GFP+	L2/3 GFP+/Dbx1-tdTOM+	L4 GFP+	L4 GFP+/Dbx1-tdTOM+	L5/6 GFP+	L5/6 GFP+/Dbx1-tdTOM+
b1	0.988949	0.0110509	0.211513	0.00603406	0.467739	0.0050168	0.107948	0	0.201749	0
b2	0.993413	0.00658703	0.230825	0.00277778	0.488551	0.00380925	0.114417	0	0.15962	0
b3	0.995668	0.00433212	0.242149	0.00433212	0.477454	0	0.143771	0	0.132294	0
Average	0.992677	0.00732334	0.228162	0.00438132	0.477915	0.00294202	0.122045	0	0.164554	0

## Sheet: P21 Hmx3_Htr3aGFP - Fig. 3C
P21 Hmx3 STUDY (PRESENTED IN FIGURE 3C)
	Image name	Overall Htr3a-GFP fraction					Image name	Overall % of Htr3a-GFP fraction			Overall % of Hmx3-tdTOM fraction
		GFP+ total	GFP+	GFP+/Hmx3-tdTOM+	Hmx3-tdTOM+			GFP+	GFP+/Hmx3-tdTOM+	% of Hmx3-tdTOM that are Htr3a-GFP	tdTOM+	GFP+/Hmx3-tdTOM+
From PROX1/SOX6 analysis	b1s1left	164	127	37	33		b1s1left	0.77439	0.22561	0.528571	0.471429	0.528571
	b1s1right	92	78	14	15		b1s1right	0.847826	0.152174	0.482759	0.517241	0.482759
	b1s2right	106	88	18	13		b1s2right	0.830189	0.169811	0.580645	0.419355	0.580645
	b1s3right	202	169	33	16		b1s3right	0.836634	0.163366	0.673469	0.326531	0.673469
	b2s1right	147	131	16	22		b2s1right	0.891156	0.108844	0.421053	0.578947	0.421053
	b2s2right	244	209	35	36		b2s2right	0.856557	0.143443	0.492958	0.507042	0.492958
	b2s2left	212	170	42	35		b2s2left	0.801887	0.198113	0.545455	0.454545	0.545455
	b2s3right	201	163	38	26		b2s3right	0.810945	0.189055	0.59375	0.40625	0.59375
	b3s1left	194	157	37	20		b3s1left	0.809278	0.190722	0.649123	0.350877	0.649123
	b3s2left	47	35	12	13		b3s2left	0.744681	0.255319	0.48	0.52	0.48
	b3s3right	129	116	13	13		b3s3right	0.899225	0.100775	0.5	0.5	0.5
	b3s3left	163	150	13	8		b3s3left	0.920245	0.0797546	0.619048	0.380952	0.619048
From NR2F2/SP8 analysis	b1niv1left	116	100	16	24		b1niv1left	0.862069	0.137931	0.4	0.6	0.4
	b1niv1right	116	101	15	22		b1niv1right	0.87069	0.12931	0.405405	0.594595	0.405405
	b1niv2left	94	80	14	21		b1niv2left	0.851064	0.148936	0.4	0.6	0.4
	b1niv3right	131	118	13	16		b1niv3right	0.900763	0.0992366	0.448276	0.551724	0.448276
	b2niv2left	141	117	24	11		b2niv2left	0.829787	0.170213	0.685714	0.314286	0.685714
	b2niv2right	146	126	20	11		b2niv2right	0.863014	0.136986	0.645161	0.354839	0.645161
	b2niv3left	123	97	26	7		b2niv3left	0.788618	0.211382	0.787879	0.212121	0.787879
	b2niv1right	149	128	21	24		b2niv1right	0.85906	0.14094	0.466667	0.533333	0.466667
	b3niv3left	90	70	20	12		b3niv3left	0.777778	0.222222	0.625	0.375	0.625
	b3niv1right	129	107	22	16		b3niv1right	0.829457	0.170543	0.578947	0.421053	0.578947
	b3niv2left	92	77	15	11		b3niv2left	0.836957	0.163043	0.576923	0.423077	0.576923
	b3niv3right	102	90	12	14		b3niv3right	0.882353	0.117647	0.461538	0.538462	0.461538
From NPY Analysis	b1s1left	58	49	9	17		b1s1left	0.844828	0.155172	0.346154	0.653846	0.346154
	b1s1right	80	66	14	11		b1s1right	0.825	0.175	0.56	0.44	0.56
	b1s2right	76	62	14	31		b1s2right	0.815789	0.184211	0.311111	0.688889	0.311111
	b2s1right	121	97	24	18		b2s1right	0.801653	0.198347	0.571429	0.428571	0.571429
	b2s2left	151	122	29	17		b2s2left	0.807947	0.192053	0.630435	0.369565	0.630435
	b2s2right	126	101	25	12		b2s2right	0.801587	0.198413	0.675676	0.324324	0.675676
	b2s3right	109	93	16	11		b2s3right	0.853211	0.146789	0.592593	0.407407	0.592593
	b3s1left	110	97	13	26		b3s1left	0.881818	0.118182	0.333333	0.666667	0.333333
	b3s2right	118	102	16	12		b3s2right	0.864407	0.135593	0.571429	0.428571	0.571429
	b3s3left	97	86	11	11		b3s3left	0.886598	0.113402	0.5	0.5	0.5
From RELN Analysis	b1s1left	74	63	11	12		b1s1left	0.851351	0.148649	0.478261	0.521739	0.478261
	b1s2right	100	82	18	13		b1s2right	0.82	0.18	0.580645	0.419355	0.580645
	b1s3left	109	90	19	12		b1s3left	0.825688	0.174312	0.612903	0.387097	0.612903
	b2s1left	70	56	14	17		b2s1left	0.8	0.2	0.451613	0.548387	0.451613
	b2s2right	122	99	23	25		b2s2right	0.811475	0.188525	0.479167	0.520833	0.479167
	b2s3left	92	85	7	11		b2s3left	0.923913	0.076087	0.388889	0.611111	0.388889
	b2s3right	107	92	15	15		b2s3right	0.859813	0.140187	0.5	0.5	0.5
	b3s1right	126	109	17	19		b3s1right	0.865079	0.134921	0.472222	0.527778	0.472222
	b3s2left	114	91	23	31		b3s2left	0.798246	0.201754	0.425926	0.574074	0.425926
	b3s3right	115	96	19	30		b3s3right	0.834783	0.165217	0.387755	0.612245	0.387755
	Total	5405	4542	863	790
					1653
Brain average	Overall % of Htr3a-GFP fraction			Overall % of Hmx3-tdTOM fraction
	GFP+	GFP+/Hmx3-tdTOM+	% of Hmx3-tdTOM that are Htr3a-GFP	tdTOM+	GFP+/Hmx3-tdTOM+
b1	0.839734	0.160266	0.4863	0.5137	0.4863
b2	0.835039	0.164961	0.558027	0.441973	0.558027
b3	0.845065	0.154935	0.512946	0.487054	0.512946
Average	0.839946	0.160054	0.519091	0.480909	0.519091

## Sheet: P21 PROX1_SOX6 - Fig. 3D
P21 PROX1/SOX6 STUDY (PRESENTED IN FIGURE 3D)
Image name	Main fractions			Dbx1-tdTOM fraction
	Dbx1-tdTOM+ tot	Dbx1-tdTOM+	Dbx1-tdTOM+/Htr3a-GFP+	Dbx1-tdTOM+/PROX1+	Dbx1-tdTOM+/SOX6+	Dbx1-tdTOM+/PROX1+/SOX6+	Dbx1-tdTOM+/Htr3a-GFP+/PROX1+	Dbx1-tdTOM+/Htr3a-GFP+/SOX6+	Dbx1-tdTOM+/Htr3a-GFP+/PROX1+/SOX6+
b1s1left	26	26	0	0	9	0	0	0	0
b1s2left	19	18	1	0	6	0	1	0	0
b1s3right	22	21	1	0	8	0	1	0	0
b1s2right	29	28	1	1	10	0	1	0	0
b3s1left	33	33	0	0	10	0	0	0	0
b3s2left	17	16	1	0	4	0	1	0	0
b3s2right	10	9	1	0	3	0	0	0	0
b3s3left	21	21	0	0	8	0	0	0	0
b3s3right	17	16	1	0	5	0	1	0	0
b4s1right	32	31	1	0	7	0	1	0	0
b4s2left	23	22	1	0	8	0	0	0	0
b4s3left	17	16	1	0	4	0	0	0	0
Total	266	257	9	1	82	0	6	0	0
	% of TFs expressed in fractions	Image name	Dbx1-tdTOM fraction
			Dbx1tdTOM+ that are Htr3a-GFP+	Dbx1tdTOM+/PROX1+	Dbx1tdTOM+/SOX6+	Dbx1tdTOM+/PROX1+/SOX6+	Dbx1-tdTOM+/Htr3a-GFP+/PROX1+	Dbx1-tdTOM+/Htr3a-GFP+/SOX6+	Dbx1-tdTOM+/Htr3a-GFP+/PROX1+/SOX6+
		b1s1left	0	0	0.346154	0	0	0	0
		b1s2left	0.0526316	0	0.315789	0	0.0526316	0	0
		b1s3right	0.0454545	0	0.363636	0	0.0454545	0	0
		b1s2right	0.0344828	0.0344828	0.344828	0	0.0344828	0	0
		b3s1left	0	0	0.30303	0	0	0	0
		b3s2left	0.0588235	0	0.235294	0	0.0588235	0	0
		b3s2right	0.1	0	0.3	0	0	0	0
		b3s3left	0	0	0.380952	0	0	0	0
		b3s3right	0.0588235	0	0.294118	0	0.0588235	0	0
		b4s1right	0.03125	0	0.21875	0	0.03125	0	0
		b4s2left	0.0434783	0	0.347826	0	0	0	0
		b4s3left	0.0588235	0	0.235294	0	0	0	0
		Total
		Brain average	Dbx1-tdTOM fraction
			Dbx1tdTOM+ that are Htr3a-GFP+	Dbx1tdTOM+/PROX1+	Dbx1tdTOM+/SOX6+	Dbx1tdTOM+/PROX1+/SOX6+	Dbx1-tdTOM+/Htr3a-GFP+/PROX1+	Dbx1-tdTOM+/Htr3a-GFP+/SOX6+	Dbx1-tdTOM+/Htr3a-GFP+/PROX1+/SOX6+
		b1	0.0331422	0.00862069	0.342602	0	0.0331422	0	0
		b2	0.0435294	0	0.302679	0	0.0235294	0	0
		b3	0.0445173	0	0.26729	0	0.0104167	0	0
		Average	0.0403963	0.00287356	0.30419	0	0.0223628	0	0
		FIGURE 3D
