# Supplementary material for: Neurogliaform cortical interneurons derive from cells in the preoptic area
Source: eLife. 2018 Mar 20;7:e32017. doi: 10.7554/eLife.32017 (PMC5860868; doi:10.7554/eLife.32017)
Supplement: Figure 4—source data 1. [file elife-32017-fig4-data1.xlsx]

## Sheet: Fig. 4B
P21 PROX1/SOX6 STUDY (PRESENTED IN FIGURE 4B)
Image name	Main fractions				Htr3a-GFP fraction			Htr3a-GFP/Nkx5.1-tdTOM fraction			Nkx5.1-tdTOM fraction
	GFP+ total	GFP+	GFP+/5.1tdTOM+	5.1tdTOM+	GFP+/PROX1+	GFP+/PROX1+/SOX6+	GFP+/SOX6+	GFP+/5.1tdTOM+/PROX1+	GFP+/5.1tdTOM+/PROX1+/SOX6+	GFP+/TOM+/SOX6+	5.1tdTOM+/PROX1+	5.1tdTOM+/PROX1+/SOX6+	5.1tdTOM+/SOX6+
b1s1left	164	127	37	33	102	0	0	21	0	0	7	0	5
b1s1right	92	78	14	15	68	0	0	10	0	0	8	0	4
b1s2right	106	88	18	13	67	0	0	10	0	0	3	0	0
b1s3right	202	169	33	16	142	0	0	24	0	0	5	0	5
b2s1right	147	131	16	22	86	0	0	6	0	0	1	0	3
b2s2right	244	209	35	36	152	0	2	18	1	0	9	0	5
b2s2left	212	170	42	35	143	0	0	33	0	0	12	0	7
b2s3right	201	163	38	26	138	0	0	29	0	0	11	0	1
b3s1left	194	157	37	20	128	0	0	22	0	0	10	0	2
b3s2left	47	35	12	13	29	0	0	10	0	0	5	0	1
b3s3right	129	116	13	13	102	0	0	10	0	0	4	0	5
b3s3left	163	150	13	8	126	0	0	9	0	0	4	0	0
Total	1901	1593	308	250	1283	0	2	202	1	0	79	0	38
			% of TFs expressed in fractions	Image name	Htr3a-GFP fraction			Htr3a-GFP/Nkx5.1-tdTOM fraction			GFP fraction undefined	GFP/5.1tdTOM fraction undefined
					GFP+/PROX1+	GFP+/PROX1+/SOX6+	GFP+/SOX6+	GFP+/5.1tdTOM+/PROX1+	GFP+/5.1tdTOM+/PROX1+/SOX6+	GFP+/TOM+/SOX6+
				b1niv1left	0.80315	0	0	0.567568	0	0	0.19685	0.432432
				b1niv1right	0.871795	0	0	0.714286	0	0	0.128205	0.285714
				b1niv2left	0.761364	0	0	0.555556	0	0	0.238636	0.444444
				b1niv3right	0.840237	0	0	0.727273	0	0	0.159763	0.272727
				b2niv2left	0.656489	0	0	0.375	0	0	0.343511	0.625
				b2niv2right	0.727273	0	0.00956938	0.514286	0.0285714	0	0.263158	0.457143
				b2niv3left	0.841176	0	0	0.785714	0	0	0.158824	0.214286
				b2niv1right	0.846626	0	0	0.763158	0	0	0.153374	0.236842
				b3niv3left	0.815287	0	0	0.594595	0	0	0.184713	0.405405
				b3niv1right	0.828571	0	0	0.833333	0	0	0.171429	0.166667
				b3niv2left	0.87931	0	0	0.769231	0	0	0.12069	0.230769
				b3niv3right	0.84	0	0	0.692308	0	0	0.16	0.307692
				Brain average	Htr3a-GFP fraction			Htr3a-GFP/Nkx5.1-tdTOM fraction			GFP fraction undefined	GFP/5.1tdTOM fraction undefined
					GFP+/PROX1+	GFP+/PROX1+/SOX6+	GFP+/SOX6+	GFP+/5.1tdTOM+/PROX1+	GFP+/5.1tdTOM+/PROX1+/SOX6+	GFP+/TOM+/SOX6+
				b1	0.819136	0	0	0.64117	0	0	0.180864	0.35883
				b2	0.767891	0	0.00239234	0.609539	0.00714286	0	0.229717	0.383318
				b3	0.840792	0	0	0.722367	0	0	0.159208	0.277633
				Average	0.809273	0	0.000797448	0.657692	0.00238095	0	0.189929	0.339927

## Sheet: Fig. 4D
P21 NR2F2/SP8 STUDY (PRESENTED IN FIGURE 4D AND FIG4-FIG SUPPLEMENT 1)
Image name	Main fractions				Htr3a-GFP fraction			Htr3a-GFP/Hmx3-tdTOM fraction			Hmx3-tdTOM fraction
	GFP+ total	GFP+	GFP+/tdTOM+	tdTOM+	GFP+/NR2F2+	GFP+/NR2F2+/SP8+	GFP+/SP8+	GFP+/tdTOM+/NR2F2+	GFP+/tdTOM+/NR2F2+/SP8+	GFP+/TOM+/SP8+	tdTOM+/NR2F2+	tdTOM+/NR2F2+/SP8+	tdTOM+/SP8+
b1niv1left	116	100	16	24	24	12	35	3	1	0	0	0	0
b1niv1right	116	101	15	22	21	16	33	7	2	1	0	0	0
b1niv2left	94	80	14	21	22	17	19	6	1	1	0	0	0
b1niv3right	131	118	13	16	35	9	25	7	0	1	0	0	0
b2niv2left	141	117	24	11	25	14	30	9	1	1	0	0	0
b2niv2right	146	126	20	11	20	25	40	10	2	0	0	0	1
b2niv3left	123	97	26	7	12	18	40	10	1	4	0	0	0
b2niv1right	149	128	21	24	22	17	30	4	2	4	0	0	0
b3niv3left	90	70	20	12	26	15	11	3	2	6	1	0	0
b3niv1right	129	107	22	16	19	19	39	8	1	1	1	0	0
b3niv2left	92	77	15	11	15	9	26	0	3	1	0	0	0
b3niv3right	102	90	12	14	23	16	21	4	2	2	0	0	0
Total	1429	1211	218	189	264	187	349	71	18	22	2	0	1
			% of TFs expressed in fractions	Image name	Htr3a-GFP fraction			Htr3a-GFP/Hmx3-tdTOM fraction			GFP fraction undefined	GFP/tdTOM fraction undefined
					GFP+/NR2F2+	GFP+/NR2F2+/SP8+	GFP+/SP8+	GFP+/tdTOM+/NR2F2+	GFP+/tdTOM+/NR2F2+/SP8+	GFP+/tdTOM+/SP8+
				b1niv1left	0.24	0.12	0.35	0.1875	0.0625	0	0.29	0.75
				b1niv1right	0.207921	0.158416	0.326733	0.466667	0.133333	0.0666667	0.306931	0.333333
				b1niv2left	0.275	0.2125	0.2375	0.428571	0.0714286	0.0714286	0.275	0.428571
				b1niv3right	0.29661	0.0762712	0.211864	0.538462	0	0.0769231	0.415254	0.384615
				b2niv2left	0.213675	0.119658	0.25641	0.375	0.0416667	0.0416667	0.410256	0.541667
				b2niv2right	0.15873	0.198413	0.31746	0.5	0.1	0	0.325397	0.4
				b2niv3left	0.123711	0.185567	0.412371	0.384615	0.0384615	0.153846	0.278351	0.423077
				b2niv1right	0.171875	0.132812	0.234375	0.190476	0.0952381	0.190476	0.460938	0.52381
				b3niv3left	0.371429	0.214286	0.157143	0.15	0.1	0.3	0.257143	0.45
				b3niv1right	0.17757	0.17757	0.364486	0.363636	0.0454545	0.0454545	0.280374	0.545455
				b3niv2left	0.194805	0.116883	0.337662	0	0.2	0.0666667	0.350649	0.733333
				b3niv3right	0.255556	0.177778	0.233333	0.333333	0.166667	0.166667	0.333333	0.333333
				Brain average	Htr3a-GFP fraction			Htr3a-GFP/Hmx3-tdTOM fraction			GFP fraction undefined	GFP/tdTOM fraction undefined
					GFP+/NR2F2+	GFP+/NR2F2+/SP8+	GFP+/SP8+	GFP+/tdTOM+/NR2F2+	GFP+/tdTOM+/NR2F2+/SP8+	GFP+/TOM+/SP8+
				b1	0.254883	0.141797	0.281524	0.4053	0.0668155	0.0537546	0.321796	0.47413
				b2	0.166998	0.159113	0.305154	0.362523	0.0688416	0.0964973	0.368735	0.472138
				b3	0.24984	0.171629	0.273156	0.211742	0.12803	0.144697	0.305375	0.51553
				Average	0.223907	0.157513	0.286612	0.326522	0.0878958	0.0983163	0.331969	0.487266
