# Supplementary material for: Neurogliaform cortical interneurons derive from cells in the preoptic area
Source: eLife. 2018 Mar 20;7:e32017. doi: 10.7554/eLife.32017 (PMC5860868; doi:10.7554/eLife.32017)
Supplement: Figure 5—source data 1. [file elife-32017-fig5-data1.xlsx]

## Sheet: Fig. 5C-F
P21 LAYERING (PRESENTED IN FIGURE 2B) AND NPY STUDY (PRESENTED IN FIGURE 5E, F)
Image name	Overall main fractions					Layer 1 main fractions				NPY analysis		Layer 2/3 main fractions				NPY analysis		Layer 4 main fractions				NPY analysis		Layer 5/6 main fractions				NPY analysis
	GFP+ total	GFP+	GFP+/tdTOM+	tdTOM+	GFP+/NPY+ total	GFP+ total	GFP+	GFP+/tdTOM+	tdTOM+	GFP+/tdTOM+/NPY+	GFP+/NPY+	GFP+ total	GFP+	GFP+/tdTOM+	tdTOM+	GFP+/tdTOM+/NPY+	GFP+/NPY+	GFP+ total	GFP+	GFP+/tdTOM+	tdTOM+	GFP+/tdTOM+/NPY+	GFP+/NPY+	GFP+ total	GFP+	GFP+/tdTOM+	tdTOM+	GFP+/tdTOM+/NPY+	GFP+/NPY+
b1s1left	58	49	9	17	19	11	9	2	4	0	1	28	22	6	5	5	4	3	3	0	3	0	2	16	15	1	5	1	6
b1s2right	80	66	14	11	19	16	10	6	0	0	2	40	34	6	5	4	9	8	7	1	3	1	0	16	15	1	3	1	2
b1s3right	76	62	14	31	22	16	12	4	3	0	1	38	31	7	16	7	8	5	4	1	9	1	0	17	15	2	3	1	4
b2s1right	121	97	24	18	14	25	14	11	3	0	0	69	60	9	5	4	4	13	9	4	7	4	0	14	14	0	3	0	2
b2s2left	151	122	29	17	36	26	14	12	1	0	0	82	68	14	9	9	19	12	11	1	5	1	2	31	29	2	2	0	5
b2s2right	126	101	25	12	32	26	18	8	1	1	2	65	54	11	3	4	10	17	13	4	2	4	3	18	16	2	6	2	6
b2s3right	109	93	16	11	23	30	24	6	3	1	1	53	45	8	7	8	9	13	11	2	0	2	0	13	13	0	1	0	2
b3s1left	110	97	13	26	29	35	30	5	3	1	6	48	41	7	8	5	12	8	8	0	7	0	0	19	18	1	8	1	4
b3s2right	118	102	16	12	30	41	30	11	1	1	1	45	43	2	7	2	19	11	9	2	2	2	1	21	20	1	2	0	4
b3s3left	97	86	11	11	24	18	15	3	4	0	2	52	46	6	2	6	7	9	9	0	5	0	3	18	16	2	0	2	4
Total	1046	875	171	166	248	244	176	68	23	4	16	520	444	76	67	54	101	99	84	15	43	15	11	183	171	12	33	8	39
				Image name	Layer distribution % of NPY in Htr3a-GFP/Hmx3-tdTOM fraction								Overall % of NPY in Htr3a-GFP/Hmx3-tdTOM fraction	Layer distribution of Htr3a-GFP and Htr3a-GFP/Hmx3-tdTOM fractions
					L1 GFP+/tdTOM+	L1 GFP+/tdTOM+/NPY+	L2/3 GFP+/tdTOM+	L2/3 GFP+/tdTOM+/NPY+	L4 GFP+/tdTOM+	L4 GFP+/tdTOM+/NPY+	L5/6 GFP+/tdTOM+	L5/6 GFP+/tdTOM+/NPY+		L1 GFP+	L1 GFP+/tdTOM+	L2/3 GFP+	L2/3 GFP+/tdTOM+	L4 GFP+	L4 GFP+/tdTOM+	L5/6 GFP+	L5/6 GFP+/tdTOM+
				b1s1left	0.222222	0	0.111111	0.555556	0	0	0	0.111111	0.666667	0.155172	0.0344828	0.37931	0.103448	0.0517241	0	0.258621	0.0172414
				b1s2right	0.428571	0	0.142857	0.285714	0	0.0714286	0	0.0714286	0.428571	0.125	0.075	0.425	0.075	0.0875	0.0125	0.1875	0.0125
				b1s3right	0.285714	0	0	0.5	0	0.0714286	0.0714286	0.0714286	0.642857	0.157895	0.0526316	0.407895	0.0921053	0.0526316	0.0131579	0.197368	0.0263158
				b2s1right	0.458333	0	0.208333	0.166667	0	0.166667	0	0	0.333333	0.115702	0.0909091	0.495868	0.0743802	0.0743802	0.0330579	0.115702	0
				b2s2left	0.413793	0	0.172414	0.310345	0	0.0344828	0.0689655	0	0.344828	0.0927152	0.0794702	0.450331	0.0927152	0.0728477	0.00662252	0.192053	0.013245
				b2s2right	0.28	0.04	0.28	0.16	0	0.16	0	0.08	0.44	0.142857	0.0634921	0.428571	0.0873016	0.103175	0.031746	0.126984	0.015873
				b2s3right	0.3125	0.0625	0	0.5	0	0.125	0	0	0.6875	0.220183	0.0550459	0.412844	0.0733945	0.100917	0.0183486	0.119266	0
				b3s1left	0.307692	0.0769231	0.153846	0.384615	0	0	0	0.0769231	0.538462	0.272727	0.0454545	0.372727	0.0636364	0.0727273	0	0.163636	0.00909091
				b3s2right	0.625	0.0625	0	0.125	0	0.125	0.0625	0	0.3125	0.254237	0.0932203	0.364407	0.0169492	0.0762712	0.0169492	0.169492	0.00847458
				b3s3left	0.272727	0	0	0.545455	0	0	0	0.181818	0.727273	0.154639	0.0309278	0.474227	0.0618557	0.0927835	0	0.164948	0.0206186
				Brain average	Layer distribution % of NPY in Htr3a-GFP/Hmx3-tdTOM fraction								Overall % of NPY in Htr3a-GFP/Hmx3-tdTOM fraction
					L1 GFP+/tdTOM+	L1 GFP+/tdTOM+/NPY+	L2/3 GFP+/tdTOM+	L2/3 GFP+/tdTOM+/NPY+	L4 GFP+/tdTOM+	L4 GFP+/tdTOM+/NPY+	L5/6 GFP+/tdTOM+	L5/6 GFP+/tdTOM+/NPY+
				b1	0.312169	0	0.0846561	0.44709	0	0.047619	0.0238095	0.0846561	0.579365
				b2	0.366157	0.025625	0.165187	0.284253	0	0.121537	0.0172414	0.02	0.451415
				b3	0.401807	0.0464744	0.0512821	0.35169	0	0.0416667	0.0208333	0.0862471	0.526078
				Average	0.360044	0.0240331	0.100375	0.361011	0	0.0702744	0.0206281	0.0636344	0.518953
				FIGURE 5E
				Image name	Layer distribution % of Hmx3-tdTOM in NPY/Htr3a-GFP fraction								Overall %GFP/tdTOM in NPY/GFP fraction
					L1 GFP+/NPY+	L1 GFP+/tdTOM+/NPY+	L2/3 GFP+/NPY+	L2/3 GFP+/tdTOM+/NPY+	L4 GFP+/NPY+	L4 GFP+/tdTOM+/NPY+	L5/6 GFP+/NPY+	L5/6 GFP+/tdTOM+/NPY+
				b1s1left	0.0526316	0	0.210526	0.263158	0.105263	0	0.315789	0.0526316	0.315789
				b1s2right	0.105263	0	0.473684	0.210526	0	0.0526316	0.105263	0.0526316	0.315789
				b1s3right	0.0454545	0	0.363636	0.318182	0	0.0454545	0.181818	0.0454545	0.409091
				b2s1right	0	0	0.285714	0.285714	0	0.285714	0.142857	0	0.571429
				b2s2left	0	0	0.527778	0.25	0.0555556	0.0277778	0.138889	0	0.277778
				b2s2right	0.0625	0.03125	0.3125	0.125	0.09375	0.125	0.1875	0.0625	0.34375
				b2s3right	0.0434783	0.0434783	0.391304	0.347826	0	0.0869565	0.0869565	0	0.478261
				b3s1left	0.206897	0.0344828	0.413793	0.172414	0	0	0.137931	0.0344828	0.241379
				b3s2right	0.0333333	0.0333333	0.633333	0.0666667	0.0333333	0.0666667	0.133333	0	0.166667
				b3s3left	0.0833333	0	0.291667	0.25	0.125	0	0.166667	0.0833333	0.333333
				Brain average	Layer distribution % of 5.1tdTOM in NPY/Htr3a-GFP fraction								Overall %GFP/5.1tdTOM in NPY/GFP fraction
					L1 GFP+/NPY+	L1 GFP+/5.1tdTOM+/NPY+	L2/3 GFP+/NPY+	L2/3 GFP+/5.1tdTOM+/NPY+	L4 GFP+/NPY+	L4 GFP+/5.1tdTOM+/NPY+	L5/6 GFP+/NPY+	L5/6 GFP+/5.1tdTOM+/NPY+
				b1	0.0677831	0	0.349282	0.263955	0.0350877	0.0326954	0.200957	0.0502392	0.34689
				b2	0.0264946	0.0186821	0.379324	0.252135	0.0373264	0.131362	0.139051	0.015625	0.417804
				b3	0.107854	0.0226054	0.446264	0.163027	0.0527778	0.0222222	0.145977	0.039272	0.247126
				Average	0.0673774	0.0137625	0.391624	0.226372	0.0417306	0.0620932	0.161995	0.0350454	0.337274
				FIGURE 5F
P21 LAYERING (PRESENTED IN FIGURE 2B) AND RELN STUDY (PRESENTED IN FIGURE 5C, D)
Image name	Overall main fractions					Layer 1 main fractions				RELN analysis		Layer 2/3 main fractions				RELN analysis		Layer 4 main fractions				RELN analysis		Layer 5/6 main fractions				RELN analysis
	GFP+ total	GFP+	GFP+/tdTOM+	tdTOM+	GFP+/RELN+ total	GFP+ total	GFP+	GFP+/tdTOM+	tdTOM+	GFP+/tdTOM+/RELN+	GFP+/RELN+	GFP+ total	GFP+	GFP+/tdTOM+	tdTOM+	GFP+/tdTOM+/RELN+	GFP+/RELN+	GFP+ total	GFP+	GFP+/tdTOM+	tdTOM+	GFP+/tdTOM+/RELN+	GFP+/RELN+	GFP+ total	GFP+	GFP+/tdTOM+	tdTOM+	GFP+/tdTOM+/RELN+	GFP+/RELN+
b1s1left	74	63	11	12	22	15	10	5	0	5	8	39	35	4	8	3	3	9	7	2	2	1	2	11	11	0	2	0	0
b1s2right	100	82	18	13	26	30	21	9	1	4	11	43	37	6	5	3	4	15	12	3	4	2	1	12	12	0	3	0	1
b1s3left	109	90	19	12	20	24	14	10	0	7	5	62	54	8	4	5	2	7	6	1	7	0	1	16	16	0	1	0	0
b2s1left	70	56	14	17	21	13	9	4	1	4	6	40	33	7	5	6	3	4	4	0	5	0	1	13	10	3	6	1	0
b2s2right	122	99	23	25	36	24	14	10	7	10	6	60	53	7	9	7	10	15	14	1	8	1	1	23	18	5	1	1	0
b2s3right	107	92	15	15	40	38	27	11	4	11	19	34	32	2	3	1	3	15	13	2	1	1	1	20	20	0	7	0	4
b3s1right	126	109	17	19	36	27	19	8	7	8	16	67	63	4	9	1	10	13	12	1	3	0	0	19	15	4	0	0	1
b3s2left	114	91	23	31	44	31	22	9	4	6	17	56	44	12	10	8	10	10	8	2	8	1	1	17	17	0	9	0	1
b3s3right	115	96	19	30	26	14	11	3	5	3	5	66	56	10	9	3	12	15	13	2	8	2	1	20	16	4	8	0	0
Total	937	778	159	174	271	216	147	69	29	58	93	467	407	60	62	37	57	103	89	14	46	8	9	151	135	16	37	2	7
				Image name	Layer distribution % of RELN in Htr3a-GFP/Hmx3-tdTOM fraction								Overall % of RELN in Htr3a-GFP/Hmx3-tdTOM fraction	Layer distribution of Htr3a-GFP and Htr3a-GFP/Hmx3-tdTOM fractions
					L1 GFP+/tdTOM+	L1 GFP+/tdTOM+/RELN+	L2/3 GFP+/tdTOM+	L2/3 GFP+/tdTOM+/RELN+	L4 GFP+/tdTOM+	L4 GFP+/tdTOM+/RELN+	L5/6 GFP+/tdTOM+	L5/6 GFP+/tdTOM+/RELN+		L1 GFP+	L1 GFP+/tdTOM+	L2/3 GFP+	L2/3 GFP+/tdTOM+	L4 GFP+	L4 GFP+/tdTOM+	L5/6 GFP+	L5/6 GFP+/tdTOM+
				b1s1left	0	0.454545	0.0909091	0.272727	0.0909091	0.0909091	0	0	0.818182	0.135135	0.0675676	0.472973	0.0540541	0.0945946	0.027027	0.148649	0
				b1s2right	0.277778	0.222222	0.166667	0.166667	0.0555556	0.111111	0	0	0.5	0.21	0.09	0.37	0.06	0.12	0.03	0.12	0
				b1s3left	0.157895	0.368421	0.157895	0.263158	0.0526316	0	0	0	0.631579	0.12844	0.0917431	0.495413	0.0733945	0.0550459	0.00917431	0.146789	0
				b2s1left	0	0.285714	0.0714286	0.428571	0	0	0.142857	0.0714286	0.785714	0.128571	0.0571429	0.471429	0.1	0.0571429	0	0.142857	0.0428571
				b2s2right	0	0.434783	0	0.304348	0	0.0434783	0.173913	0.0434783	0.826087	0.114754	0.0819672	0.434426	0.057377	0.114754	0.00819672	0.147541	0.0409836
				b2s3right	0	0.733333	0.0666667	0.0666667	0.0666667	0.0666667	0	0	0.866667	0.252336	0.102804	0.299065	0.0186916	0.121495	0.0186916	0.186916	0
				b3s1right	0	0.470588	0.176471	0.0588235	0.0588235	0	0.235294	0	0.529412	0.150794	0.0634921	0.5	0.031746	0.0952381	0.00793651	0.119048	0.031746
				b3s2left	0.130435	0.26087	0.173913	0.347826	0.0434783	0.0434783	0	0	0.652174	0.192982	0.0789474	0.385965	0.105263	0.0701754	0.0175439	0.149123	0
				b3s3right	0	0.157895	0.368421	0.157895	0	0.105263	0.210526	0	0.421053	0.0956522	0.026087	0.486957	0.0869565	0.113043	0.0173913	0.13913	0.0347826
				Brain average	Layer distribution % of RELN in Htr3a-GFP/Hmx3-tdTOM fraction								Overall % of RELN in Htr3a-GFP/Hmx3-tdTOM fraction
					L1 GFP+/tdTOM+	L1 GFP+/tdTOM+/RELN+	L2/3 GFP+/tdTOM+	L2/3 GFP+/tdTOM+/RELN+	L4 GFP+/tdTOM+	L4 GFP+/tdTOM+/RELN+	L5/6 GFP+/tdTOM+	L5/6 GFP+/tdTOM+/RELN+
				b1	0.145224	0.348396	0.13849	0.234184	0.0663654	0.0673401	0	0	0.64992
				b2	0	0.48461	0.0460317	0.266529	0.0222222	0.036715	0.10559	0.0383023	0.826156
				b3	0.0434783	0.296451	0.239602	0.188181	0.0341006	0.0495805	0.148607	0	0.534213
				Average	0.0629008	0.376486	0.141374	0.229631	0.0408961	0.0512118	0.0847323	0.0127674	0.670096
				Image name	Layer distribution % of Hmx3-tdTOM in RELN/Htr3a-GFP fraction								Overall %GFP/tdTOM in RELN/GFP fraction
					L1 GFP+/RELN+	L1 GFP+/tdTOM+/RELN+	L2/3 GFP+/RELN+	L2/3 GFP+/tdTOM+/RELN+	RELN+	L4 GFP+/tdTOM+/RELN+	L5/6 GFP+/RELN+	L5/6 GFP+/tdTOM+/RELN+
				b1s1left	0.363636	0.227273	0.136364	0.136364	0.0909091	0.0454545	0	0	0.409091
				b1s2right	0.423077	0.153846	0.153846	0.115385	0.0384615	0.0769231	0.0384615	0	0.346154
				b1s3left	0.25	0.35	0.1	0.25	0.05	0	0	0	0.6
				b2s1left	0.285714	0.190476	0.142857	0.285714	0.047619	0	0	0.047619	0.52381
				b2s2right	0.166667	0.277778	0.277778	0.194444	0.0277778	0.0277778	0	0.0277778	0.527778
				b2s3right	0.475	0.275	0.075	0.025	0.025	0.025	0.1	0	0.325
				b3s1right	0.444444	0.222222	0.277778	0.0277778	0	0	0.0277778	0	0.25
				b3s2left	0.386364	0.136364	0.227273	0.181818	0.0227273	0.0227273	0.0227273	0	0.340909
				b3s3right	0.192308	0.115385	0.461538	0.115385	0.0384615	0.0769231	0	0	0.307692
				Brain average	Layer distribution % of Hmx3-tdTOM in RELN/Htr3a-GFP fraction								Overall %GFP/tdTOM in RELN/GFP fraction	Layer distribution of Htr3a-GFP and Htr3a-GFP/Hmx3-tdTOM fractions MERGE STUDY
					L1 GFP+/RELN+	L1 GFP+/tdTOM+/RELN+	L2/3 GFP+/RELN+	L2/3 GFP+/tdTOM+/RELN+	RELN+	L4 GFP+/tdTOM+/RELN+	L5/6 GFP+/RELN+	L5/6 GFP+/tdTOM+/RELN+		L1 GFP+	L1 GFP+/tdTOM+	L2/3 GFP+	L2/3 GFP+/tdTOM+	L4 GFP+	L4 GFP+/tdTOM+	L5/6 GFP+	L5/6 GFP+/tdTOM+
				b1	0.345571	0.243706	0.13007	0.167249	0.0597902	0.0407925	0.0128205	0	0.451748	0.15194	0.0685708	0.425098	0.0763337	0.076916	0.0153099	0.176488	0.00934286
				b2	0.309127	0.247751	0.165212	0.168386	0.0334656	0.0175926	0.0333333	0.0251323	0.458862	0.152446	0.075833	0.427505	0.07198	0.0921017	0.0166662	0.147331	0.016137
				b3	0.341039	0.15799	0.322196	0.108327	0.0203963	0.0332168	0.016835	0	0.299534	0.186839	0.0563549	0.430714	0.0610678	0.0867065	0.00997014	0.150896	0.0174521
				Average	0.331912	0.216483	0.205826	0.147988	0.037884	0.030534	0.0209963	0.00837743	0.403381	0.163742	0.0669196	0.427772	0.0697938	0.0852414	0.0139821	0.158238	0.0143106
																									1

## Sheet: Fig. 5H
P21 RELN/NPY OVERLAP STUDY (PRESENTED IN FIGURE 5H)
Image name	Main fractions				Htr3a-GFP fraction			Htr3a-GFP/Hmx3-tdTOM fraction			Hmx3-tdTOM fraction
	GFP+ total	GFP+	GFP+/tdTOM+	tdTOM+	GFP+/RELN+	GFP+/NPY+	GFP+/RELN+/NPY+	GFP+/tdTOM+/RELN+	GFP+/tdTOM+/NPY+	GFP+/tdTOM+/RELN+/NPY+	tdTOM+/RELN+	tdTOM+/NPY+	tdTOM+/RELN+/NPY+
b1niv1left	237	203	34	29	35	28	16	11	2	12	0	2	0
b1niv1right	126	109	17	20	21	22	6	14	2	3	0	1	0
b1niv2left	283	230	53	43	32	39	17	7	2	14	0	2	0
b1niv3left	217	188	29	14	46	20	9	6	2	4	0	0	0
b2niv1left	193	164	29	35	33	22	15	23	4	6	0	0	1
b2niv2right	147	122	25	25	21	9	4	16	4	5	0	0	0
b2niv3left	195	168	27	20	48	11	11	17	0	6	0	0	0
b2niv3right	135	117	18	26	23	23	3	10	1	1	0	0	0
Total	1533	1301	232	212	259	174	81	104	17	51	0	5	1
			% of markers expressed in fractions	Image name	Htr3a-GFP fraction			Htr3a-GFP/Hmx3-tdTOM fraction			GFP fraction undefined	GFP/tdTOM fraction undefined	Overall % of RELN in Htr3a-GFP/Hmx3-tdTOM fraction	Overall % of NPY in Htr3a-GFP/Hmx3-tdTOM fraction	Overall %GFP/tdTOM in RELN/GFP fraction	Overall %GFP/tdTOM in NPY/GFP fraction
					GFP+/RELN+	GFP+/NPY+	GFP+/RELN+/NPY+	GFP+/tdTOM+/RELN+	GFP+/tdTOM+/NPY+	GFP+/tdTOM+/RELN+/NPY+
				b1niv1left	0.172414	0.137931	0.0788177	0.323529	0.0588235	0.352941	0.610837	0.588235	0.676471	0.411765	0.310811	0.241379
				b1niv1right	0.192661	0.201835	0.0550459	0.823529	0.117647	0.176471	0.550459	0.705882	1	0.294118	0.386364	0.151515
				b1niv2left	0.13913	0.169565	0.073913	0.132075	0.0377358	0.264151	0.617391	0.698113	0.396226	0.301887	0.3	0.222222
				b1niv3left	0.244681	0.106383	0.0478723	0.206897	0.0689655	0.137931	0.601064	0.793103	0.344828	0.206897	0.153846	0.171429
				b2niv1left	0.20122	0.134146	0.0914634	0.793103	0.137931	0.206897	0.573171	0.655172	1	0.344828	0.376623	0.212766
				b2niv2right	0.172131	0.0737705	0.0327869	0.64	0.16	0.2	0.721311	0.64	0.84	0.36	0.456522	0.409091
				b2niv3left	0.285714	0.0654762	0.0654762	0.62963	0	0.222222	0.583333	0.777778	0.851852	0.222222	0.280488	0.214286
				b2niv3right	0.196581	0.196581	0.025641	0.555556	0.0555556	0.0555556	0.581197	0.888889	0.611111	0.111111	0.297297	0.0714286
				Brain average	Htr3a-GFP fraction			Htr3a-GFP/Hmx3-tdTOM fraction			GFP fraction undefined	GFP/tdTOM fraction undefined	Overall % of RELN in Htr3a-GFP/Hmx3-tdTOM fraction	Overall % of NPY in Htr3a-GFP/Hmx3-tdTOM fraction	Overall % of GFP/tdTOM in RELN/GFP fraction MERGE STUDY	Overall % of GFP/tdTOM in NPY/GFP fraction MERGE STUDY
					GFP+/RELN+	GFP+/NPY+	GFP+/RELN+/NPY+	GFP+/tdTOM+/RELN+	GFP+/tdTOM+/NPY+	GFP+/tdTOM+/RELN+/NPY+
				b1	0.187221	0.153929	0.0639122	0.371508	0.070793	0.232873	0.594938	0.696334	0.604381	0.303666	0.287755	0.196636
				b2	0.213912	0.117494	0.0538419	0.654572	0.0883716	0.171169	0.614753	0.74046	0.825741	0.25954	0.352733	0.226893
				b3
				Average	0.200566	0.135711	0.0588771	0.51304	0.0795823	0.202021	0.604845	0.718397	0.715061	0.281603	0.320244	0.211765
															Overall % of RELN in Htr3a-GFP/Hmx3-tdTOM fraction MERGE STUDY	Overall % of NPY in Htr3a-GFP/Hmx3-tdTOM fraction MERGE STUDY
															0.604381	0.303666
															0.825741	0.25954
															0.715061	0.281603
