# Supplementary material for: Neurogliaform cortical interneurons derive from cells in the preoptic area
Source: eLife. 2018 Mar 20;7:e32017. doi: 10.7554/eLife.32017 (PMC5860868; doi:10.7554/eLife.32017)
Supplement: Figure 6—source data 1. [file elife-32017-fig6-data1.xlsx]

## Sheet: P30 Car4
FISH QUANTIFICATION (PRESENTED IN FIGURE 6A)
L1 cells
cell origin	Cell ID		Car4 number of transcripts
Hmx3-tdTOM-;Htr3a-GFP+	b1s1	L1-Cell1	0
		L1-Cell2	0
		L1-Cell3	4
		L1-Cell4	0
		L1-Cell5	8
	b1s2	L1-Cell6	0
		L1-Cell7	2
		L1-Cell8	0
		L1-Cell9	1
		L1-Cell10	3
		L1-Cell11	0
	b1s3	L1-Cell12	1
		L1-Cell13	0
		L1-Cell14	2
		L1-Cell15	1
		L1-Cell16	0
		L1-Cell17	2
		L1-Cell18	0
	b2s1	L1-Cell19	0
		L1-Cell20	3
		L1-Cell21	0
		L1-Cell22	3
		L1-Cell23	2
		L1-Cell24	2
	b2s2	L1-Cell25	2
		L1-Cell26	1
		L1-Cell27	3
		L1-Cell28	0
		L1-Cell29	4
		L1-Cell30	0
Hmx3-tdTOM+;Htr3a-GFP+	b1s1	L1-Cell31	36
		L1-Cell32	17
		L1-Cell33	27
		L1-Cell34	36
	b1s2	L1-Cell35	12
		L1-Cell36	20
		L1-Cell37	25
		L1-Cell38	13
		L1-Cell39	49
	b1s3	L1-Cell40	34
		L1-Cell41	20
		L1-Cell42	8
		L1-Cell43	3
		L1-Cell44	18
	b2s1	L1-Cell45	16
		L1-Cell46	16
		L1-Cell47	10
		L1-Cell48	0
	b2s2	L1-Cell49	5
		L1-Cell50	22
	Total	50	431
