# Supplementary material for: Neurogliaform cortical interneurons derive from cells in the preoptic area
Source: eLife. 2018 Mar 20;7:e32017. doi: 10.7554/eLife.32017 (PMC5860868; doi:10.7554/eLife.32017)
Supplement: Figure 6—source data 2. [file elife-32017-fig6-data2.xlsx]

## Sheet: ELECTROPHYSIOLOGY
ELECTROPHYSIOLOGY STUDY (PRESENTED IN FIGURE 6E-J AND IN FIGURE 6-FIGURE SUPPLEMENT 1)
L1 cells
cell ID	cell origin	AP type	Rm (Mohm)	Vrest (mV)	Vthr (mV)	delay (ms)	Peak (mV)	AHP (mV)	ADP (mV)	LOOCV prediction
A2	Hmx3-tdTOM+;Htr3a-GFP+	1a	293.129	-76.164	-34.54	47.6006	62.31	-15.336	0	0.727223
A4		1a	214.483	-75.8	-40.22	41.7998	64.87	-12.29	0	0.542853
A7		1a	198.28	-74.16	-41.26	62.4	65.46	-13.32	0	0.566502
A8		1a	587.9	-73.73	-42.85	69.2	58.04	-14.52	0	0.781587
A10		1a	348.867	-77.05	-41.16	182.5	56.99	-18.54	0	0.879658
A11		1b	176.84	-67.54	-32.54	29.4	45.65	-13.358	0	0.891358
A12		1a	316.633	-72.5	-33.77	463	59.62	-18.93	0	0.854861
A13		1b	206.14	-75.59	-30.36	48	52.13	-14.2	0	0.844629
A14		1b	192.743	-66.34	-31.85	38.1	65.13	-11.89	0	0.545335
A15		1a	395.7	-69.85	-32.73	304.7	60.82	-18.026	0	0.826182
A18		1a	415.575	-72.087	-38.24	95	67.56	-16.86	0	0.658684
A19		1a	379.967	-72.22	-34.026	92.234	53.9	-11.45	0	0.77858
A20		1a	337.8	-73.125	-37.94	37.1	58.27	-9.24	0	0.620476
A21		1a	199.7	-71.5	-35.8	282.3	59.7	-14	0	0.720761
A22		1a	237.3	-70.8	-36.4	64.3	68.4	-15.5	0	0.58833
A23		1a	185	-60.9	-29.7	430.9	47	-12.6	0	0.866062
A24		1a	427.74	-53.9	-33	187.2	56.5	-20.2	0	0.910793
A26		1b	561.28	-77	-44.5	127.7	59.4	-5.8	0	0.39469
A27		1a	352.283	-65.6	-41.1	31.1	50.5	-15.2	0	0.893109
A28		1a	418.36	-66	-42.9	346.7	69	-9.8	0	0.357335
A30		1a	275.45	-69.8	-30.5	216.2	47.5	-15.3	0	0.912101
A32		1a	255.1	-69.317	-28.12	397.5	47.815	-27.493	0	0.981074
A33		1b	86.1	-53.059	-33.412	11.4	54..40	-7.976	0	0.56584
A38		1a	377.267	-69.803	-36.005	40.9	60.951	-15.789	0	0.772464
A39		1b	143.2	-72.495	-35.941	21.8	63.448	-11.542	0	0.577032
A40		1a	201.667	-62.532	-35.454	11.1	57.061	-12.612	0	0.73069
A46		1a	405.533	-69.728	-32.25	236.7	56.775	-21.819	0	0.925263
A47		1a	460.2	-71.219	-34.32	318.4	51.176	-16.826	0	0.913873
A48		1a	225.1	-67.629	-31.677	49	61.908	-17.524	0	0.778237
B3	Hmx3-tdTOM-;Htr3a-GFP+	2a	323.425	-70.513	-39.538	99	65.36	-2.98	0.77	0.193899
B4		1a	227.675	-78.89	-37.17	158.8	69.31	-12.48	0	0.538185
B5		2b	199.9	-70.59	-41.78	32.7	72.94	-10.34	2.98	0.0446075
B6		2b	227.233	-64.98	-35.74	75.6	61.07	-10.4	0.94	0.443899
B7		1b	149.567	-70.76	-46.23	51.5	68.06	-12.71	0	0.572777
B8		2b	140.825	-69.92	-33.41	40.6	60.33	-10.89	0.39	0.598139
B10		2b	178.525	-63.04	-33.99	37.5	55.24	-9.47	0.13	0.748712
B12		1a	295.475	-79.45	-37.27	290.8	57.35	-20.85	0	0.956734
B14		2b	196.78	-72.64	-45.92	170	68.92	-8.72	2.24	0.0887588
B15		2b	133.433	-76.79	-43.23	53.2	74.04	-4.11	1.72	0.0450753
B18		2b	131.9	-72.38	-34.54	42.2	71.54	-11.4	4.51	0.0262131
B19		1b	179.6	-70.823	-37.609	35.5	62.65	-8.719	0	0.550797
B20		2b	263.4	-72.28	-35.42	93.9	60.66	-7.76	1.13	0.343865
B21		2b	232.32	-64.079	-41.84	40.8	73.82	-7.42	0.36	0.20215
B22		2a	291.733	-73.42	-43.62	106.3	63.15	-6.387	7.91	0.00105463
B23		2a	243.48	-73.74	-39.31	126	78.75	-6.127	8.68	0.000159454
B24		2b	175.26	-73.71	-34.74	59.9	75.99	-15.62	4.47	0.0245062
B25		2b	187.34	-71.83	-30.49	64.5	61.37	-12.16	3.79	0.0954737
B27		2b	213.409	-63.21	-39.69	36.6	75.85	-11.64	2.04	0.0884546
B29		2b	162	-71.96	-37.75	30.2	80.4	-9.96	6.74	0.000927512
B31		2b	349.967	-62.88	-36.62	427	69.8	-9.24	4.18	0.0336051
B32		2b	197.825	-69.17	-37.95	147.9	75.05	-11.15	1.53	0.129823
B34		2b	136	-72.6	-36.2	48.7	67.6	-9.2	3	0.0811469
B36		2b	360.54	-65.3	-43.1	79.4	58.64	-1.6	0	0.534897
B37		2b	521.2	-59	-45	35.7	70.04	-12.5	0	0.681787
B38		2b	678.233	-74.416	-42.037	226.5	57.154	-11.607	2.529	0.543932
B39		2b	166.6	-69.014	-31.196	64.7	67.867	-16.676	1.427	0.490605
B40		2a	541.4	-76.465	-41.742	127.9	61.435	-4.798	4.571	0.0308241
