# Supplementary material for: Neurogliaform cortical interneurons derive from cells in the preoptic area
Source: eLife journal article supplement (doi:10.7554/elife.32017), 2018-03-20
Supplement: figures [file elife-32017-figures-v2.pdf]

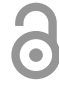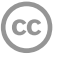

---

## Figures and figure supplements

Neurogliaform cortical interneurons derive from cells in the preoptic area

**Mathieu Niquille *et al***

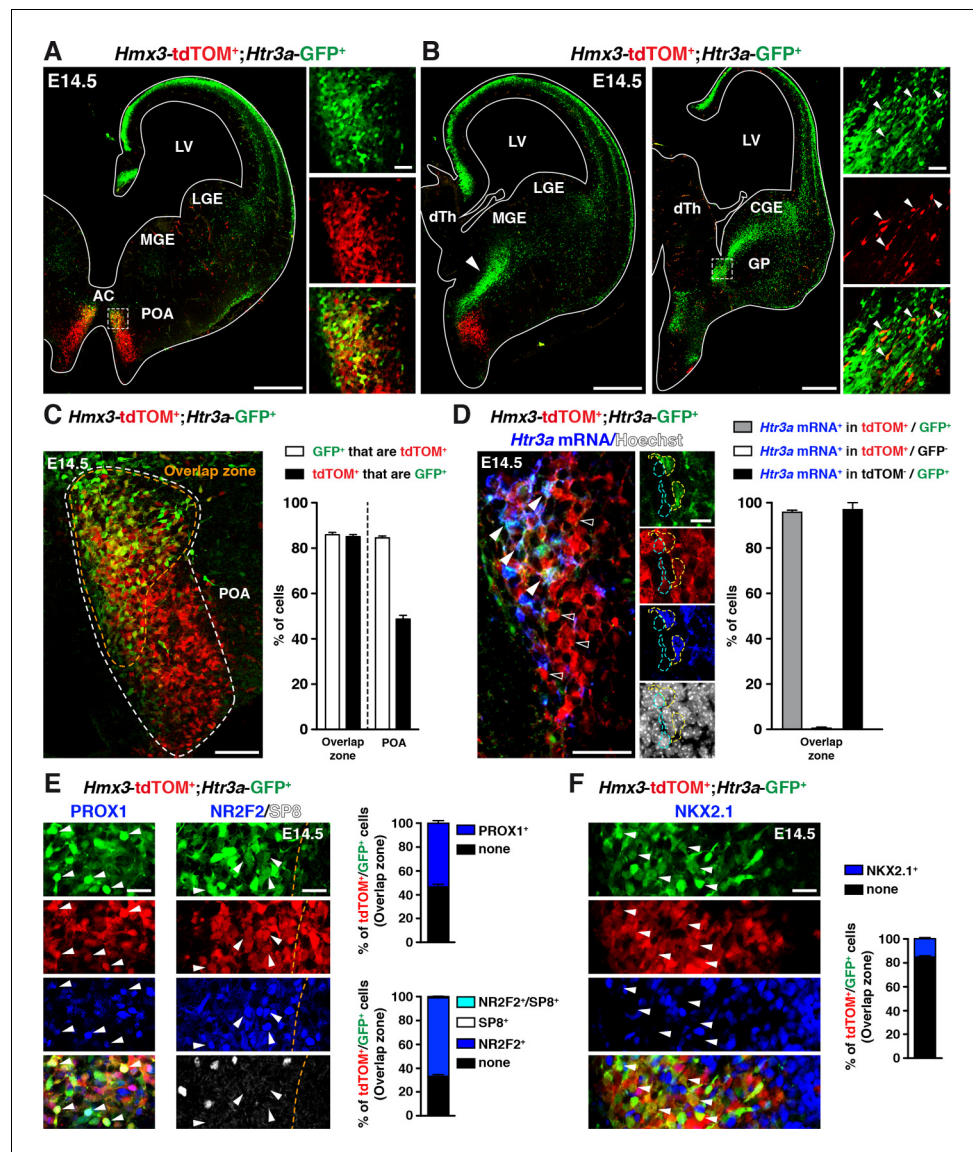

**Figure 1.** A fraction of 5-HT<sub>3A</sub>-expressing interneurons (INs) originates from *Hmx3*-derived cells in the preoptic area (POA) and expresses transcription factors related to the caudal ganglionic eminence (CGE). (A) At E14.5, tdTOM specifically labels cells expressing *Hmx3* (*Hmx3*; tdTOM<sup>+</sup>). *Htr3a*-GFP<sup>+</sup> INs co-label with tdTOM in a rostral region of the POA (dashed lines; high magnified images) located ventrally to the anterior commissure (AC). (B) At more caudal levels, *Hmx3*; tdTOM<sup>+</sup>/*Htr3a*-GFP<sup>+</sup> embryonic cells appear to further migrate caudally (arrowhead) towards the CGE. High magnified images show *Hmx3*; tdTOM<sup>+</sup>/*Htr3a*-GFP<sup>+</sup> cells entering the ventral CGE (dashed lines). (C) More than 80% of *Hmx3*; tdTOM<sup>+</sup> cells co-label with *Htr3a*-GFP (and conversely) in the overlap zone (orange dashed line) of the POA domain defined by *Hmx3*; tdTOM recombination (white dashed line). (D) *In situ* hybridization showing that almost all *Hmx3*; tdTOM<sup>+</sup>/*Htr3a*-GFP<sup>+</sup> INs in the POA express the *Htr3a* mRNA (arrowheads; yellow outline), whereas *Hmx3*; tdTOM<sup>+</sup> cells do not (empty arrowheads; cyan outline). (E) In the overlap zone of the POA, IHC reveals that *Hmx3*; tdTOM<sup>+</sup>/*Htr3a*-GFP<sup>+</sup> embryonic cells express (arrowheads) the CGE-enriched transcription factors PROX1 (left) and NR2F2 but not SP8 (right). (F) By contrast, the vast majority of *Hmx3*; tdTOM<sup>+</sup>/*Htr3a*-GFP<sup>+</sup> INs do not express NKX2.1 (arrowheads). dTh: dorsal thalamus, GP: globus pallidus, LGE: lateral ganglionic eminence, LV: lateral ventricle, MGE: medial ganglionic eminence. Scale bars: 300  $\mu$ m in A, B: low magnified images; 100  $\mu$ m in C, D: low magnified images; 50  $\mu$ m in A, B: high magnified images; 25  $\mu$ m in E, F; 10  $\mu$ m in D: high magnified images.

DOI: <https://doi.org/10.7554/eLife.32017.003>

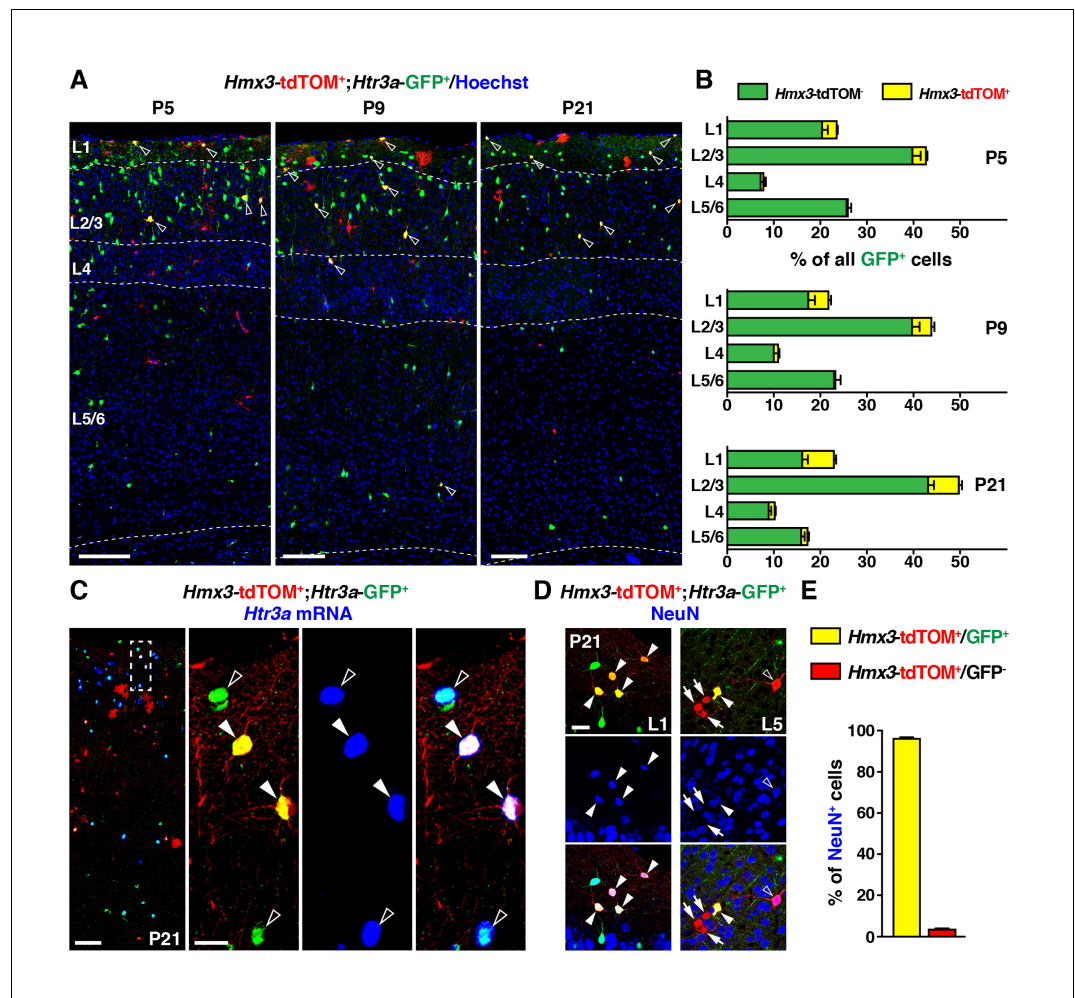

**Figure 2.** During the postnatal period, *Hmx3*-derived cells from the preoptic area (Gelman et al., 2009) constitute a small but persistent fraction of 5-HT<sub>3A</sub>R-expressing interneurons (INs) (Lee et al., 2010) in superficial cortical layers. (A–B) *Hmx3*; tdTOM<sup>+</sup>/*Htr3a*-GFP<sup>+</sup> cells represent a fraction of *Htr3a*-GFP<sup>+</sup> INs that increases along postnatal ages P5 (left), P9 (middle) and P21 (right). Note that double-labeled cells (open arrowheads) are mainly located in superficial cortical layers. (C) *In situ* hybridization showing that, at P21, *Htr3a* mRNA is found in cortical *Hmx3*; tdTOM<sup>+</sup>/*Htr3a*-GFP<sup>+</sup> INs (arrowheads) as in *Htr3a*-GFP<sup>+</sup> INs (open arrowheads). (D–E) *Hmx3*; tdTOM<sup>+</sup>/*Htr3a*-GFP<sup>+</sup> cells largely express the neuronal marker NeuN (arrowheads) whereas those negative for *Htr3a*-GFP only rarely do (arrows, open arrowhead). Scale bars: 100 μm in A, C: low magnified images; 25 μm in C: high magnified images, D.

DOI: <https://doi.org/10.7554/eLife.32017.005>

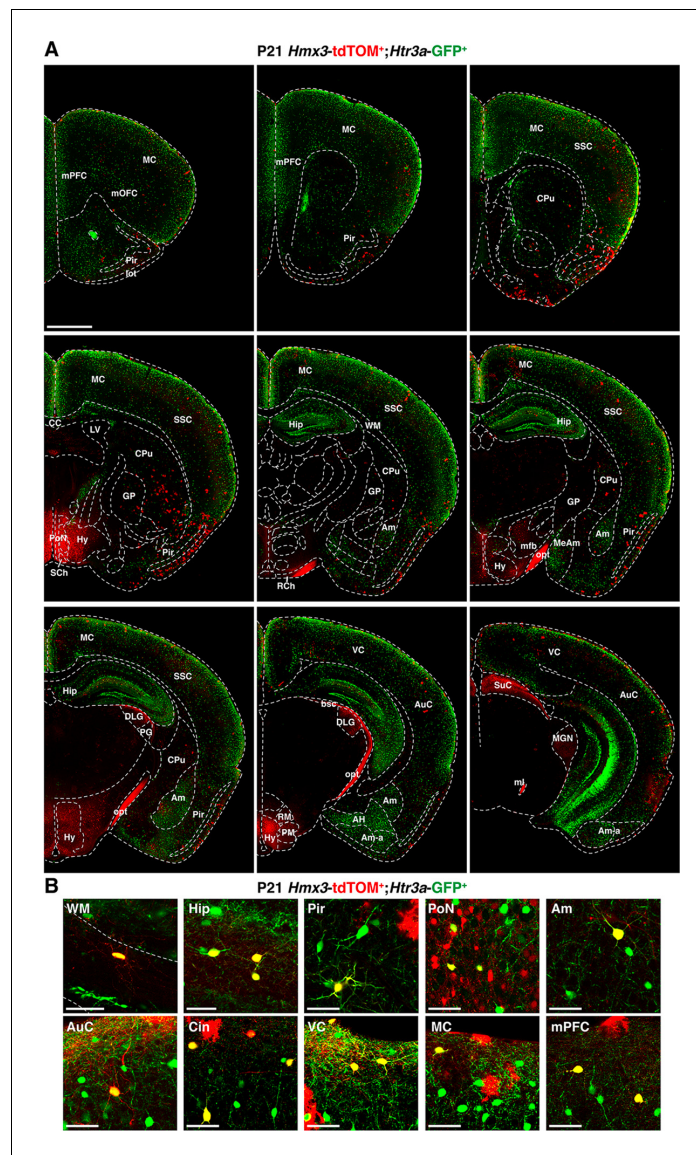

**Figure 2—figure supplement 1.** Rostro-caudal distribution of *Hmx3*; tdTOM+/Htr3a-GFP+ cells at P21. (A) *Hmx3*; tdTOM+/Htr3a-GFP+ cells are observed in a variety of cortical areas as well as other brain regions including the hippocampus (Hip) and the amygdala (Am) (B) High magnified images showing *Hmx3*; tdTOM+/Htr3a-GFP+ cells in various brain regions. AH: amygdalo-hippocampal area, Am-a: amygdaloid areas, AuC: auditory cortex, bsc: brachius of the superior colliculus, CC: corpus callosum, CPU: caudate putamen (striatum), DLG: dorso-lateral geniculate nucleus, GP: globus pallidus, Hy: hypothalamus, lot: lateral olfactory tract, LV: lateral ventricle, MC: motor cortex, MeAm: medial amygdala, mfb: medial forebrain boundle, ml: medial lemniscus, MGN: medial geniculate nucleus, mOFC: medial orbitofrontal cortex, mPFC: medial prefrontal cortex, opt: optic tract, PG: progeniculate nucleus, Pir: piriform cortex, PM: pre-mamillary nuclei, PoN: preoptic nucleus, RCh: retrochiasmatic area, RM: retro-mamillary nuclei, Sch: suprachiasmatic nucleus, SSC: somatosensory cortex, SuC: superior colliculus (optic nerve layer and superficial grey layer), VC: visual cortex, WM: white matter. Scale bars: 5 mm in A; 50  $\mu$ m in B.

DOI: <https://doi.org/10.7554/eLife.32017.006>



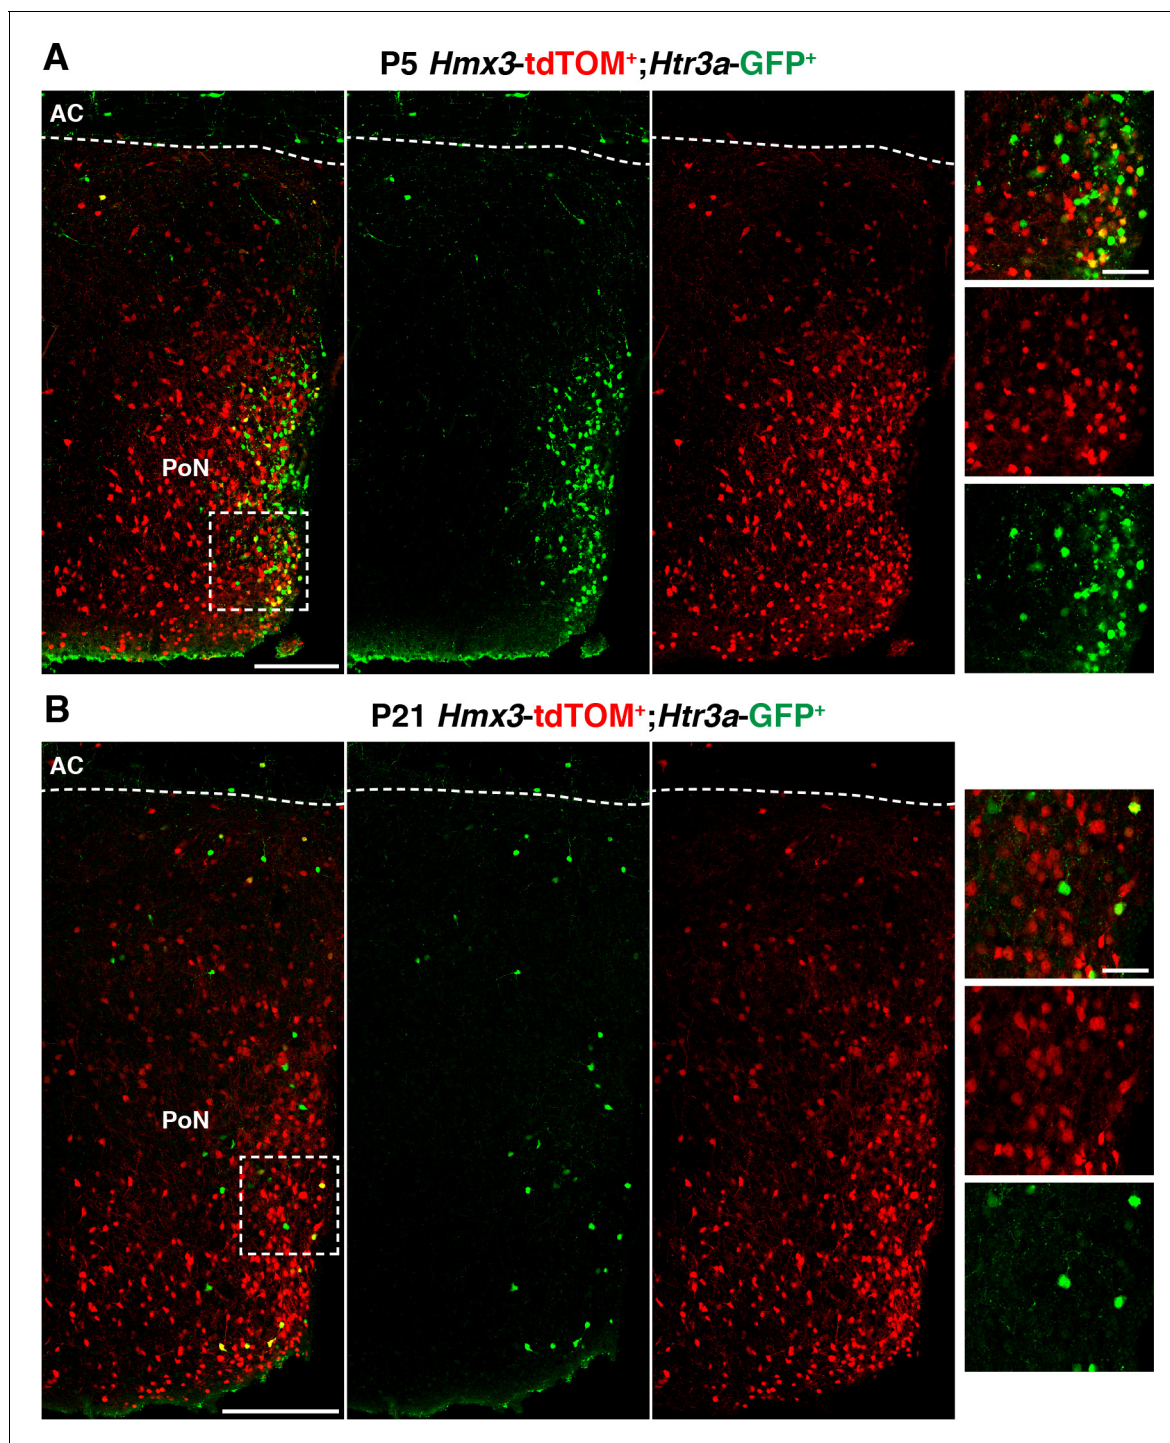

**Figure 2—figure supplement 2.** At postnatal ages, *Hmx3*; tdTOM+/Htr3a-GFP+ cells are rarely observed in the preoptic nuclei (PoN), the subpallial brain region corresponding to the embryonic preoptic area. (A–B) *Hmx3*; tdTOM+ cells negative for *Htr3a*-GFP are present in PoN at P5 (A), and P21 (B) where rare *Hmx3*; tdTOM+/Htr3a-GFP+ were found (high magnified images). AC: anterior commissure. Scale bars: 300  $\mu$ m in A, B: low magnified images; 50  $\mu$ m in A, B: high magnified images.

DOI: <https://doi.org/10.7554/eLife.32017.007>

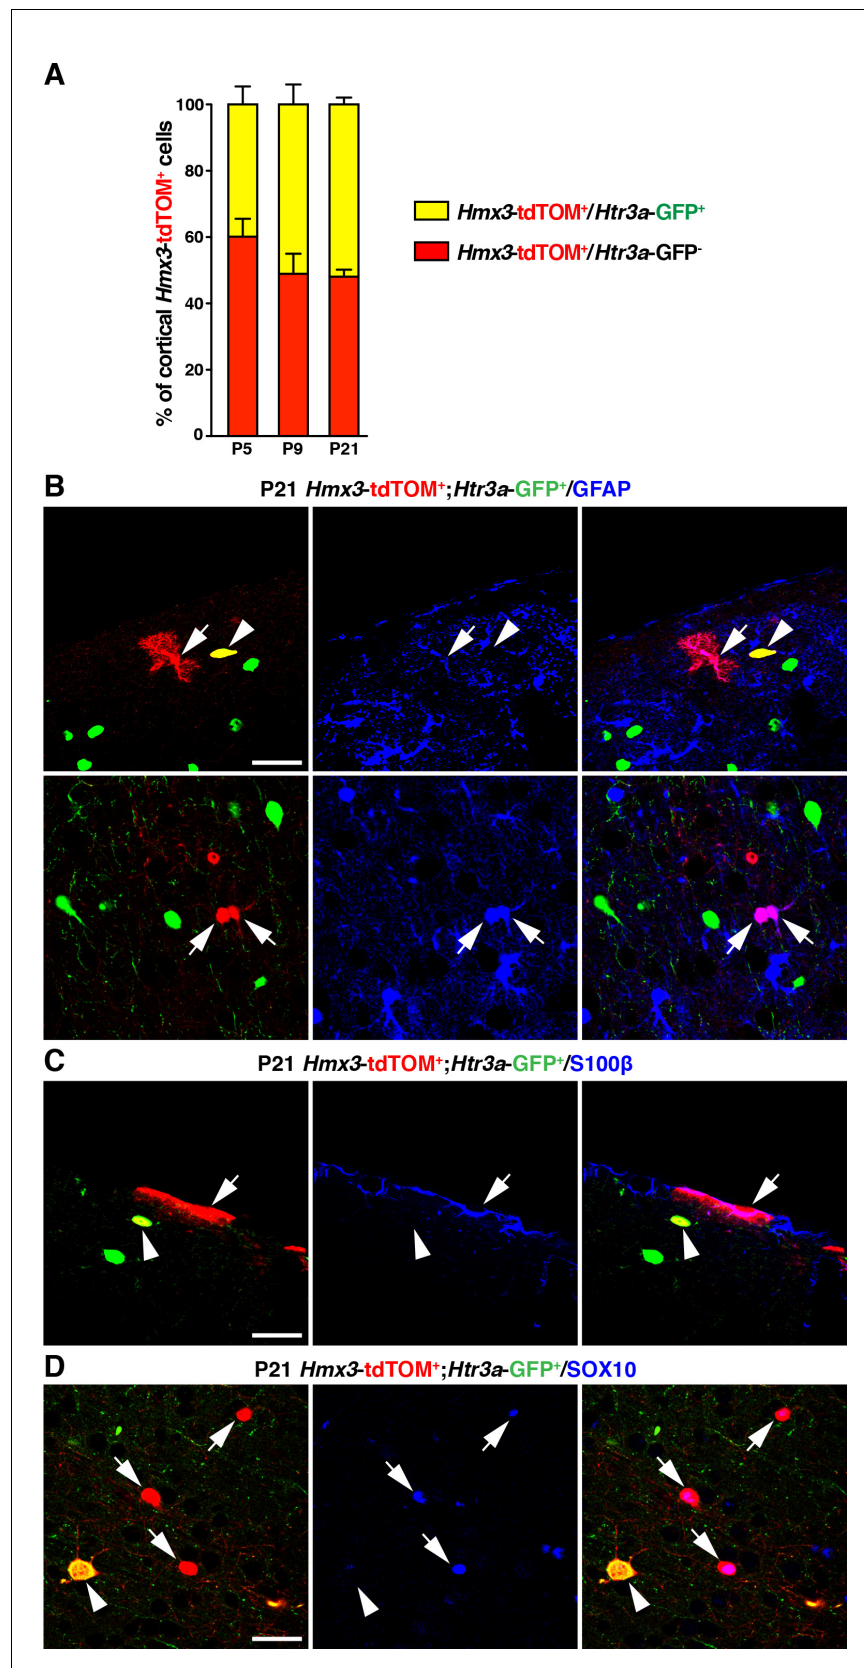

**Figure 2—figure supplement 3.** *Hmx3*; tdTOM<sup>+</sup> cells negative for *Htr3a-GFP* often express glial markers. (A) The fraction of *Hmx3*; tdTOM<sup>+</sup> cells negative for *Htr3a-GFP* is relatively stable across postnatal ages. (B–D) *Hmx3*; Figure 2—figure supplement 3 continued on next page

*Figure 2—figure supplement 3 continued*

tdTOM+ cells negative for *Htr3a*-GFP express the astrocytic markers GFAP (B; arrows), S100 $\beta$  (C; arrow) and the oligodendrocytic transcription factor SOX10 (D; arrows). In contrast, *Hmx3*; tdTOM+/*Htr3a*-GFP+ cells are negative for these markers (B-D; arrowheads). Scale bar: 50  $\mu$ m in B, C, D.

DOI: <https://doi.org/10.7554/eLife.32017.008>



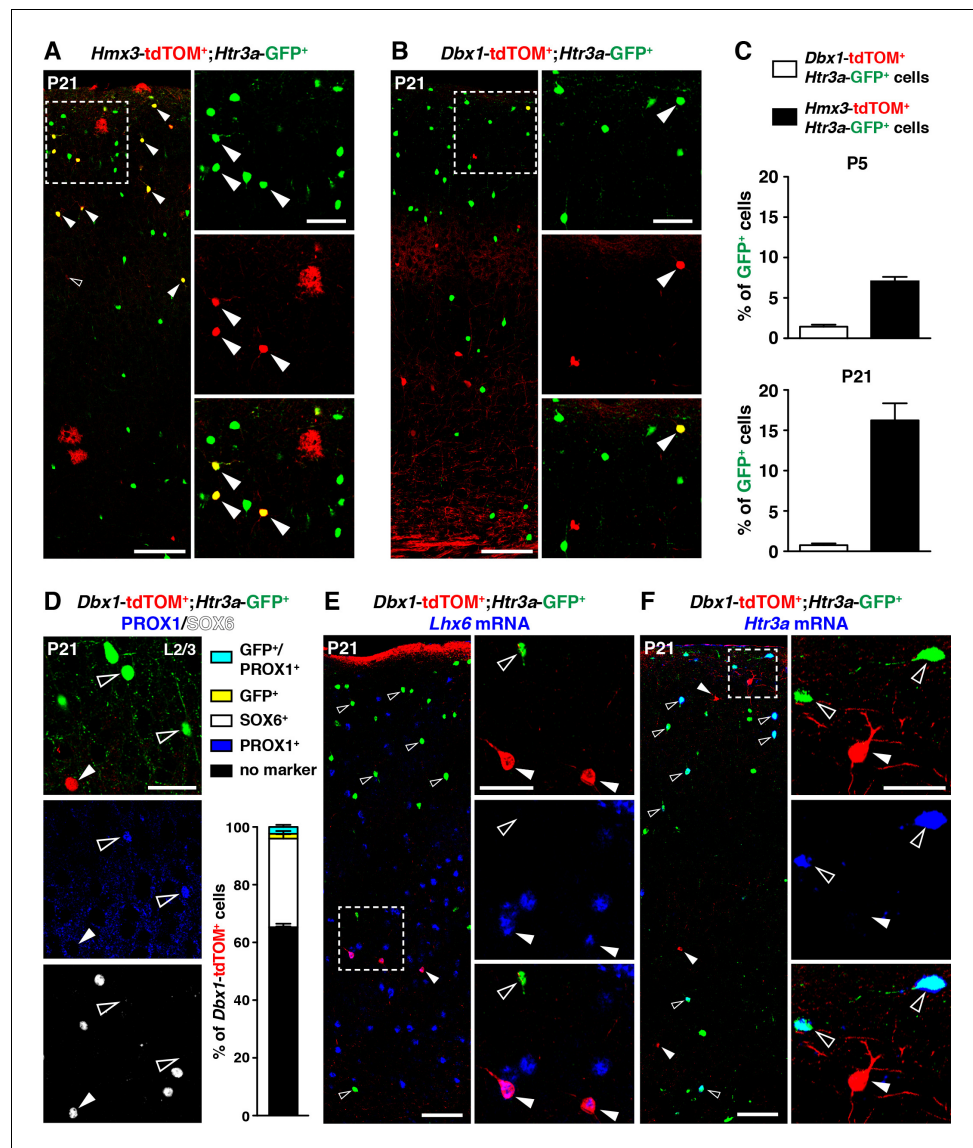

**Figure 3.** 5-HT<sub>3A</sub>R-expressing interneurons (INs) largely originate from *Hmx3*<sup>+</sup> but not *Dbx1*<sup>+</sup> cells. (A–C) A consistent fraction of cortical *Htr3a*-GFP<sup>+</sup> INs co-labels with *Hmx3*; tdTOM (A, arrowheads) at P5 and P21, whereas only a minimal fraction does with *Dbx1*; tdTOM (B, arrowhead). (D) *Dbx1*; tdTOM<sup>+</sup> INs express the MGE-enriched TF SOX6 (arrowhead) but not the CGE-enriched TF PROX1 (open arrowheads). Only a minimal fraction of *Dbx1*; tdTOM<sup>+</sup> co-labelled for *Htr3a*-GFP, among which the majority were PROX1<sup>+</sup>. (E–F) *In situ* hybridization showing that *Dbx1*; tdTOM<sup>+</sup> INs express the transcript for the MGE-enriched TF *Lhx6* (E, arrowheads) whereas *Htr3a*-GFP<sup>+</sup> INs do not (E, open arrowheads). In contrast, *Dbx1*; tdTOM<sup>+</sup> INs do not express the *Htr3a* transcript (F, arrowheads) whereas *Htr3a*-GFP<sup>+</sup> INs do (F, open arrowheads). Scale bars: 100 μm in A, B, E, F: low magnified images; 50 μm in A, B, D, E, F: high magnified images.

DOI: <https://doi.org/10.7554/eLife.32017.011>



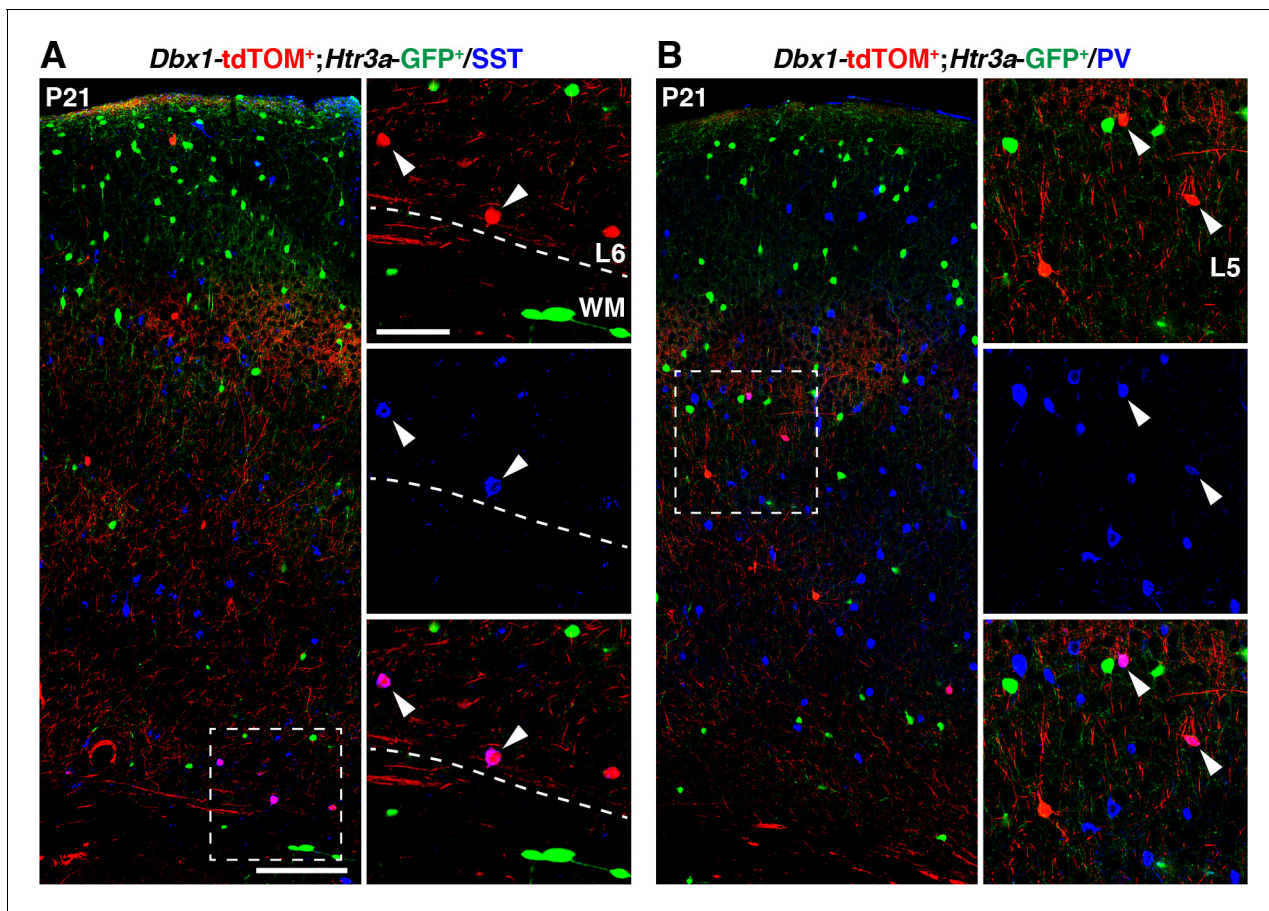

**Figure 3—figure supplement 1.** Interneurons (INs) derived from *Dbx1*<sup>+</sup> cells express MGE-enriched markers. (A–B) *Dbx1*<sup>+</sup>tdTOM<sup>+</sup> cells negative for *Htr3a*-GFP express the neurochemical markers somatostatin (SST) (A, arrowheads) and parvalbumin (PV) (B, arrowheads). WM: white matter. Scale bars: 100  $\mu$ m in A, B: low magnified images; 50  $\mu$ m in A, B: high magnified images.

DOI: <https://doi.org/10.7554/eLife.32017.012>

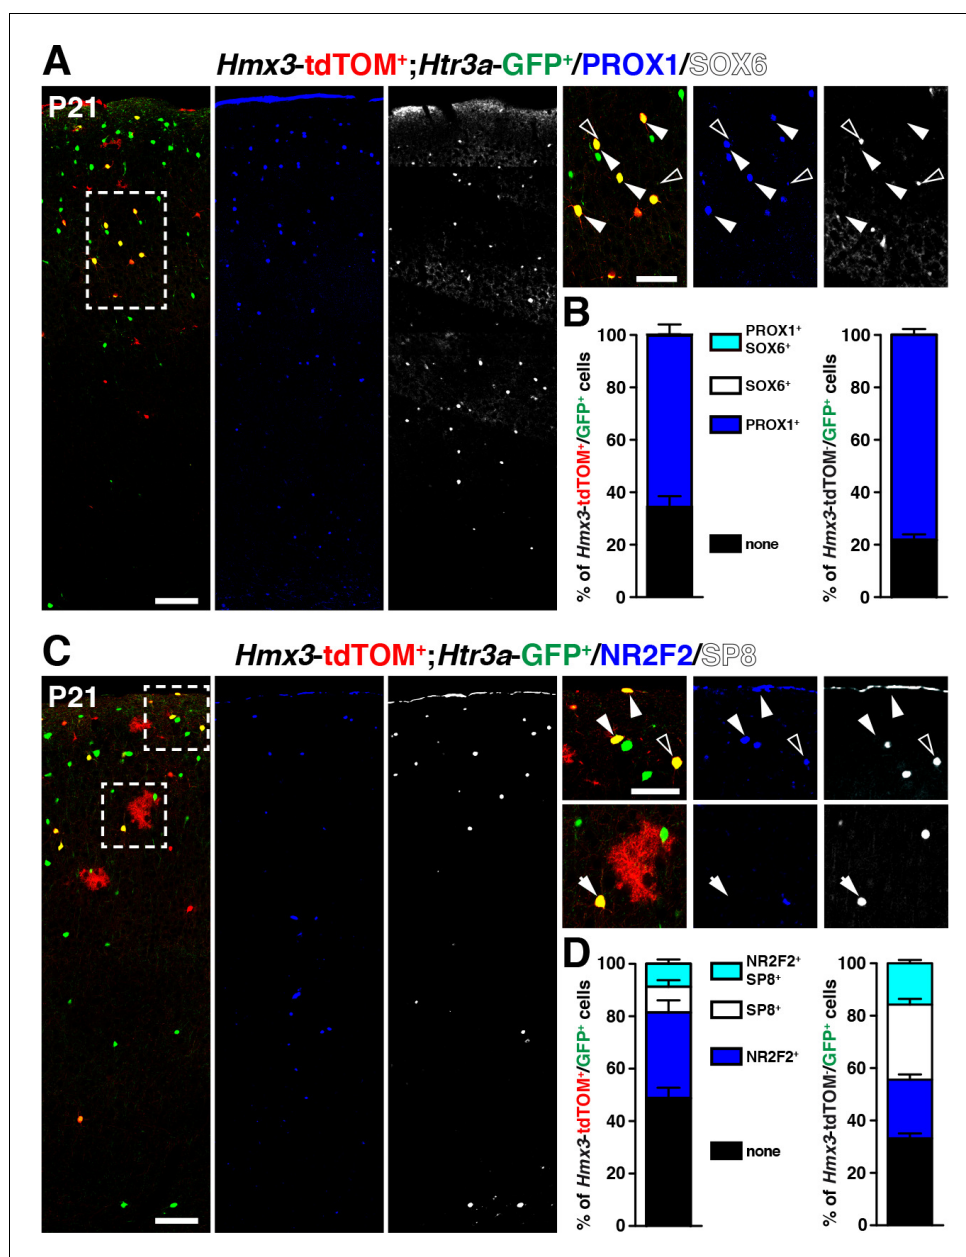

**Figure 4.** *Hmx3*; *tdTOM*<sup>+</sup>/*Htr3a*-GFP<sup>+</sup> cortical interneurons (INs) express markers related to the CGE but not to the MGE. (A–B) *Hmx3*; *tdTOM*<sup>+</sup>/*Htr3a*-GFP<sup>+</sup> INs express the CGE-enriched TF *PROX1* (A; arrowheads) but not the MGE-related TF *SOX6* (A; open arrowheads) similarly to *Htr3a*-GFP<sup>+</sup> INs that do not derive from *Hmx3*<sup>+</sup> cells (B, right graph). (C–D) *Hmx3*; *tdTOM*<sup>+</sup>/*Htr3a*-GFP<sup>+</sup> cells express the CGE-enriched TFs *NR2F2* (arrowheads) and (open arrowheads)/or *SP8* (arrow). *Htr3a*-GFP<sup>+</sup> derived from *Hmx3*<sup>+</sup> cells are biased towards *NR2F2* expression, in comparison to *Htr3a*-GFP<sup>+</sup> INs that do not co-label with *Hmx3*; *tdTOM* (D, blue bars). Scale bars: 100 μm in A, C: low magnified images; 50 μm in A, C: high magnified images.

DOI: <https://doi.org/10.7554/eLife.32017.014>

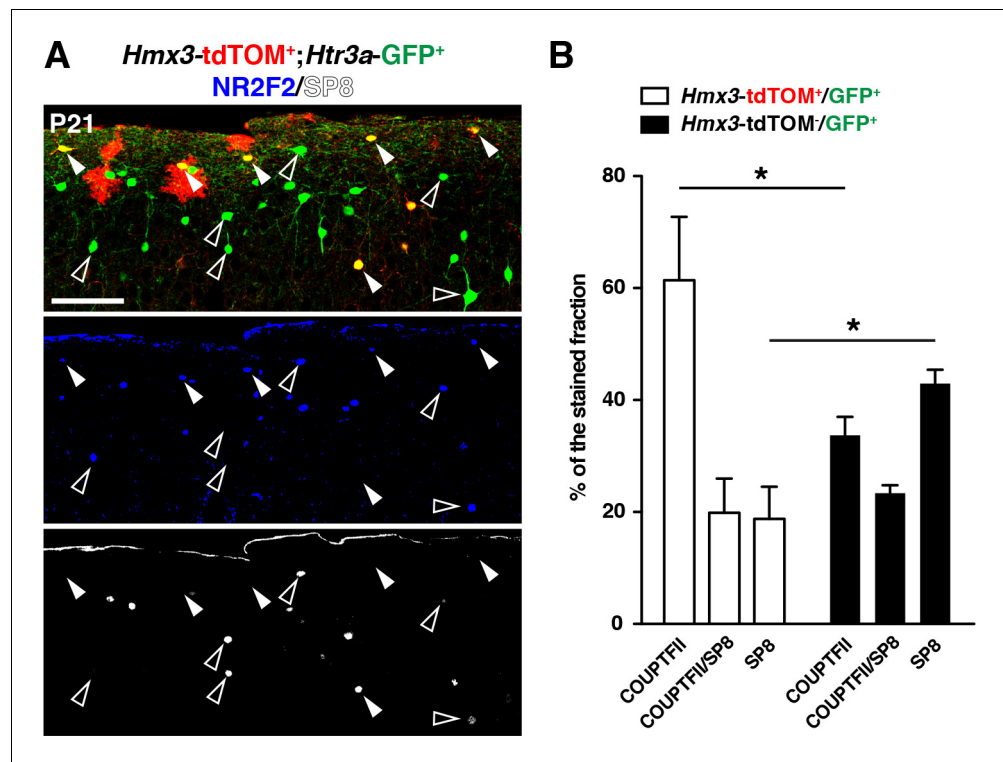

**Figure 4—figure supplement 1.** *Hmx3*; *tdTOM*<sup>+</sup>/*Htr3a*-GFP<sup>+</sup> cortical interneurons (INs) display a combinatorial expression of NR2F2 and SP8 that is biased toward NR2F2. (A) *Hmx3*; *tdTOM*<sup>+</sup>/*Htr3a*-GFP<sup>+</sup> INs (A; arrowheads) express significantly (one-way ANOVA; \**p*<0.05) more NR2F2 alone and less SP8 alone as compared to *Htr3a*-GFP<sup>+</sup> INs negative for *Hmx3*; *tdTOM* (A; open arrowheads). Scale bar: 100  $\mu$ m in A.

DOI: <https://doi.org/10.7554/eLife.32017.015>

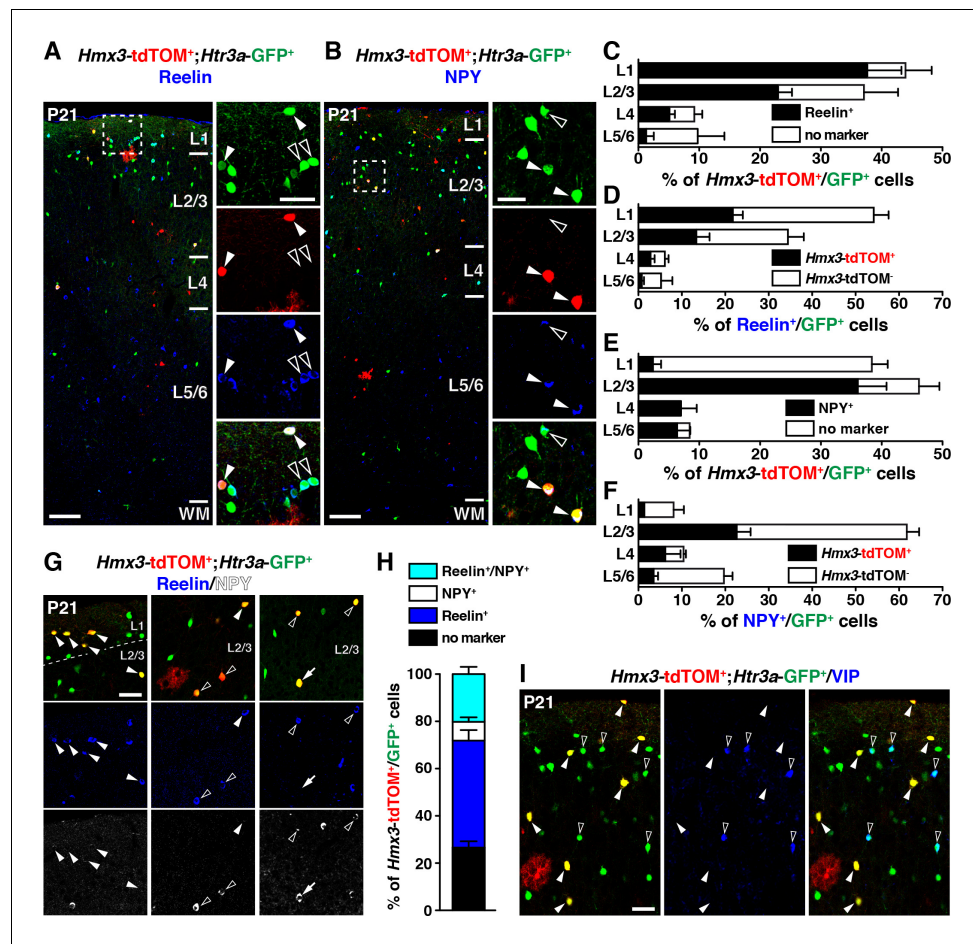

**Figure 5.** *Hmx3*; *tdTOM*<sup>+</sup>/*Htr3a*-GFP<sup>+</sup> cortical interneurons (INs) express reelin and NPY but not VIP. (A–F) *Hmx3*; *tdTOM*<sup>+</sup>/*Htr3a*-GFP<sup>+</sup> INs are stained with the neurochemical markers reelin (A, arrowheads) and NPY (B, arrowheads) as well as *Htr3a*-GFP<sup>+</sup> cells negative for *Hmx3*; *tdTOM* (open arrowheads). Note that reelin-positive *Hmx3*; *tdTOM*<sup>+</sup>/*Htr3a*-GFP<sup>+</sup> INs are preferentially found in L1–3 (C) whereas NPY-expressing *Hmx3*; *tdTOM*<sup>+</sup>/*Htr3a*-GFP<sup>+</sup> INs are mainly found in L2–6 (E). *Hmx3*; *tdTOM*<sup>+</sup>/*Htr3a*-GFP<sup>+</sup> INs account for more than one third of all reelin-positive *Htr3a*-GFP<sup>+</sup> (D) and of all NPY-positive *Htr3a*-GFP<sup>+</sup> cells (F). (G–H) *Hmx3*; *tdTOM*<sup>+</sup>/*Htr3a*-GFP<sup>+</sup> INs mainly express reelin (G, arrowheads) or reelin and NPY (G, open arrowheads) but to a smaller extent only NPY (G, arrow). (I) *Hmx3*; *tdTOM*<sup>+</sup>/*Htr3a*-GFP<sup>+</sup> INs do not express VIP (arrowheads), whereas *Htr3a*-GFP<sup>+</sup> INs negative for *Hmx3*; *tdTOM* do (open arrowheads). WM: white matter. Scale bars: 100  $\mu$ m in A, B: low magnified images; 50  $\mu$ m in A, B: high magnified images, G, I.

DOI: <https://doi.org/10.7554/eLife.32017.017>



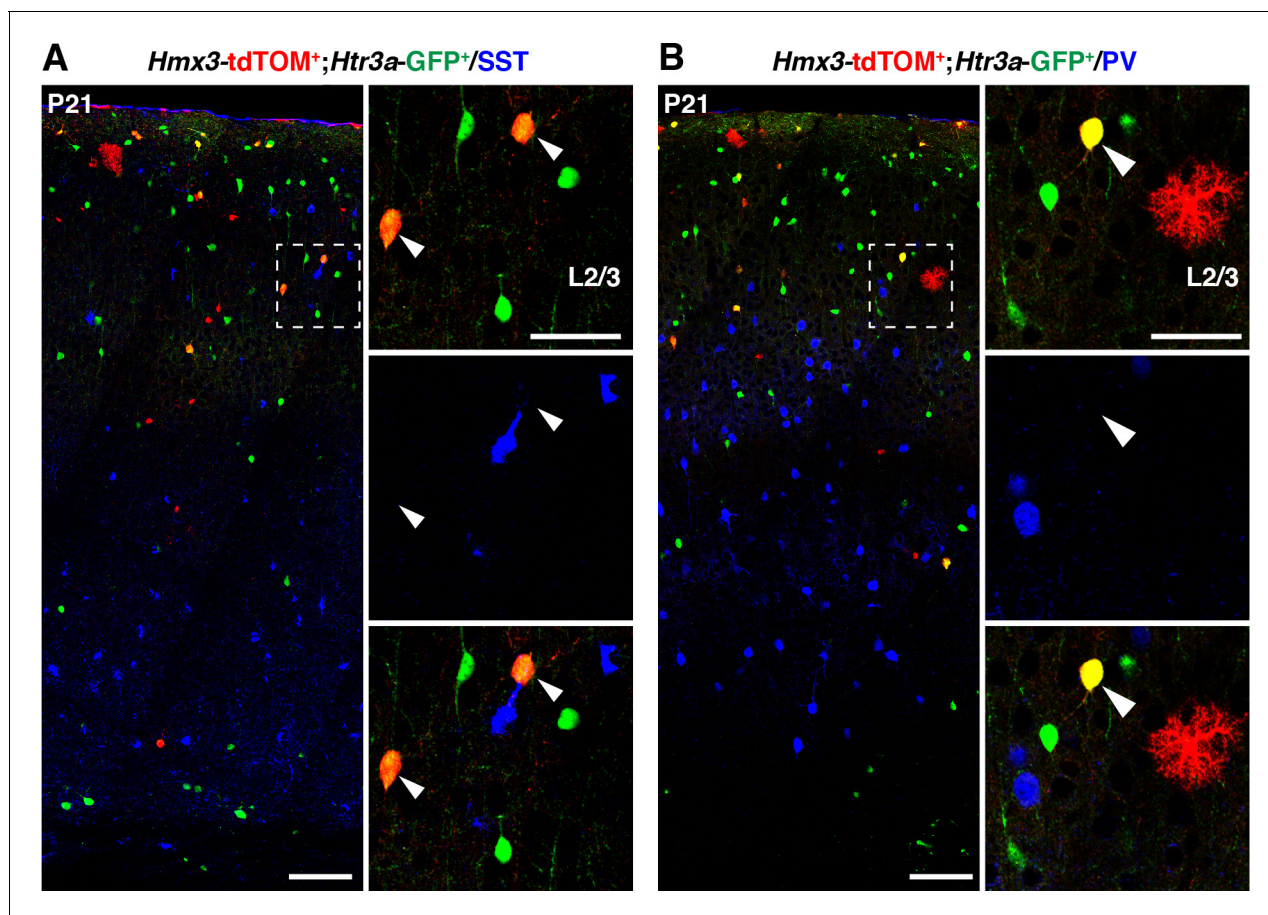

**Figure 5—figure supplement 1.** *Hmx3*; tdTOM+/*Htr3a*-GFP+ do not express MGE-enriched markers. (A–B) *Hmx3*; tdTOM+/*Htr3a*-GFP+ cells do not express the neurochemical markers somatostatin (SST) (A, arrowheads) and parvalbumin (PV) (B, arrowheads). WM: white matter. Scale bars: 100 μm in A, B: low magnified images; 50 μm in A, B: high magnified images.

DOI: <https://doi.org/10.7554/eLife.32017.018>

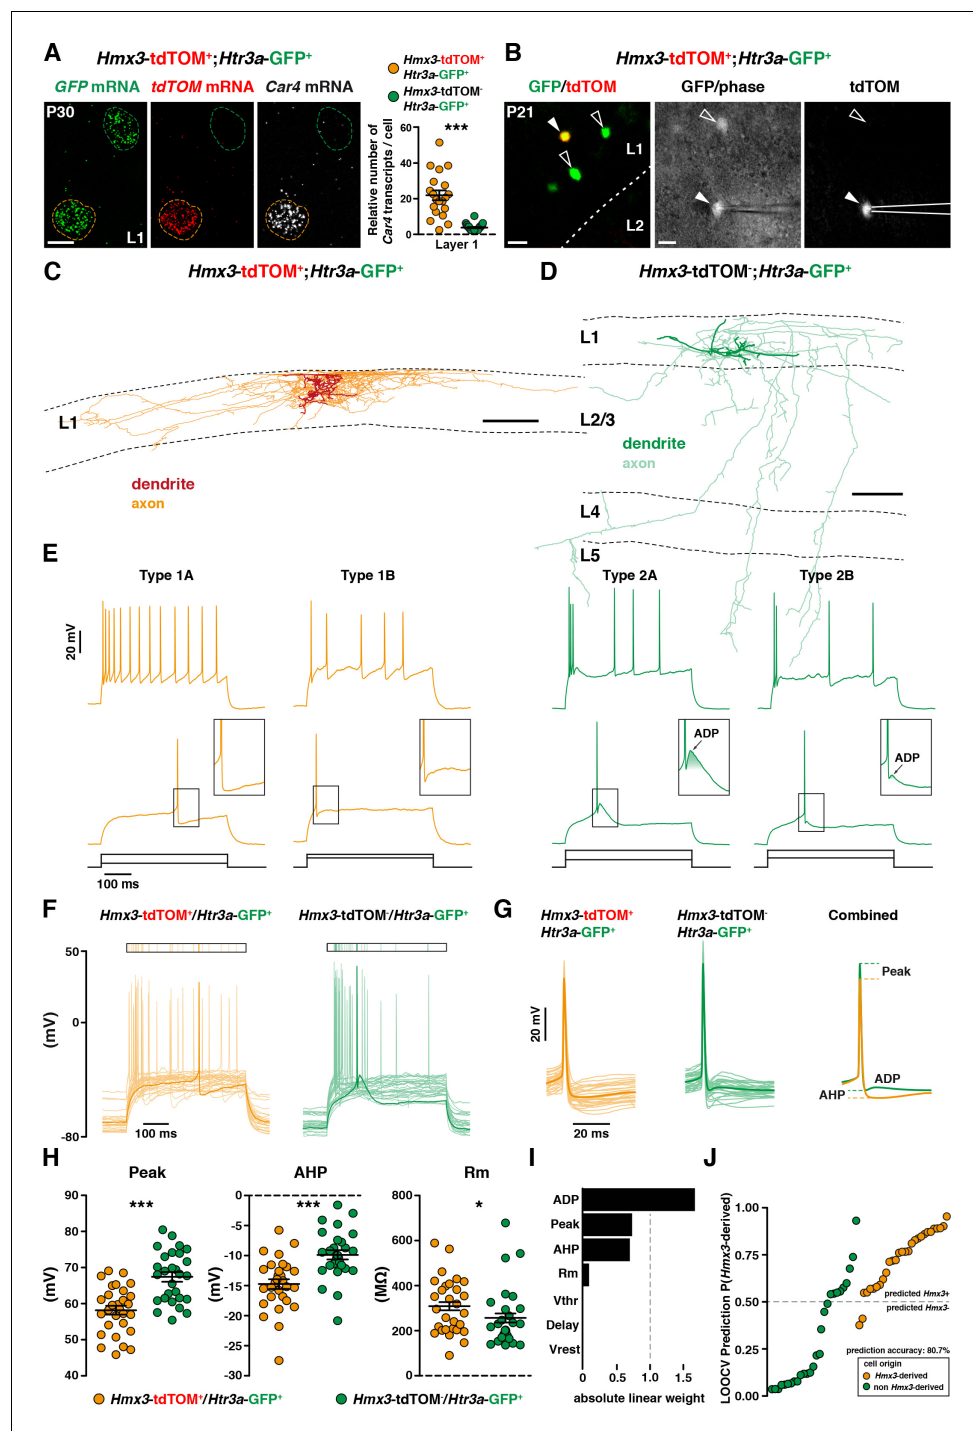

**Figure 6.** *Hmx3*; *tdTOM*<sup>+</sup>/*Htr3a*-GFP<sup>+</sup> cortical interneurons (INs) in layer 1 (L1) display the molecular, morphological and electrophysiological features of neurogliaform cells (NGCs). (A) RNAscope multiplex fluorescent hybridization for *tdTOM*, *GFP* and *Car4* transcripts on P30 brains showing that L1 *Hmx3*; *tdTOM*<sup>+</sup>/*Htr3a*-GFP<sup>+</sup> INs express *Car4* at significantly higher levels (orange outline) as compared to *Htr3a*-GFP<sup>+</sup> INs negative for *tdTOM* (green outline) (\*\*\*) (p < 0.0001; Mann-Whitney test). (B) Example of a L1 *Hmx3*; *tdTOM*<sup>+</sup>/*Htr3a*-GFP<sup>+</sup> IN (open arrowhead) or *Htr3a*-GFP<sup>+</sup> INs negative for *tdTOM* (green outline) checked before patching (left image). Example of a patched *Hmx3*; *tdTOM*<sup>+</sup>/*Htr3a*-GFP<sup>+</sup> IN (middle and right images, arrowhead). (C) Illustrative reconstruction of a *Hmx3*; *tdTOM*<sup>+</sup>/*Htr3a*-GFP<sup>+</sup> IN in L1 displaying the characteristic morphology of an elongated NGC with dense axonal ramifications restricted to L1. (D) Illustrative reconstruction of a *Htr3a*-GFP<sup>+</sup> IN negative for *tdTOM* in L1 displaying the characteristic morphology of single bouquet-like cell (SBC) with axonal

Figure 6 continued on next page

## Figure 6 continued

ramifications extending deep into L5. (E) Illustrative traces from recorded *Hmx3*; tdTOM+/*Htr3a*-GFP+ INs (orange) and *Htr3a*-GFP+ INs negative for tdTOM (green), showing the first action potentials (APs) at rheobase and trains of APs at higher current injections. (F) Superimposed single AP traces at rheobase of all *Hmx3*; tdTOM+/*Htr3a*-GFP+ INs (orange) and *Htr3a*-GFP+ INs negative for tdTOM (green). Thick traces correspond to type 1A and type 2A examples in E. (G) Same traces as in (F), aligned to the AP, with a lower time scale. Thin lines are individual cell traces and thick lines are trace averages. The average traces on the right are aligned to the threshold potential ( $V_{thr}$ ). (H) Plots of AP peak amplitude (Peak; \*\*\* $p < 0.0001$ ; unpaired t-test), after hyperpolarization potential amplitude (AHP; \*\*\* $p < 0.0001$ ; unpaired t-test) and membrane resistance ( $R_m$ ; \* $p = 0.0318$ ; Mann-Whitney test) showing significant differences between the two cell types. (I) Absolute linear weights assigned by the classification model trained on all cells with standardized electrophysiological properties. (J) Prediction probabilities estimated by the classifier on the cell left out in the leave-one-out-cross-validation (LOOCV) loop. Cells are ordered on the x-axis by origin and prediction value, and the color code reflect their origin. Cells above the probability threshold 0.5 are more likely to be *Hmx3*-derived according to the model. Scale bars: 10  $\mu m$  A; 20  $\mu m$  in B; 100  $\mu m$  C, D.

DOI: <https://doi.org/10.7554/eLife.32017.020>

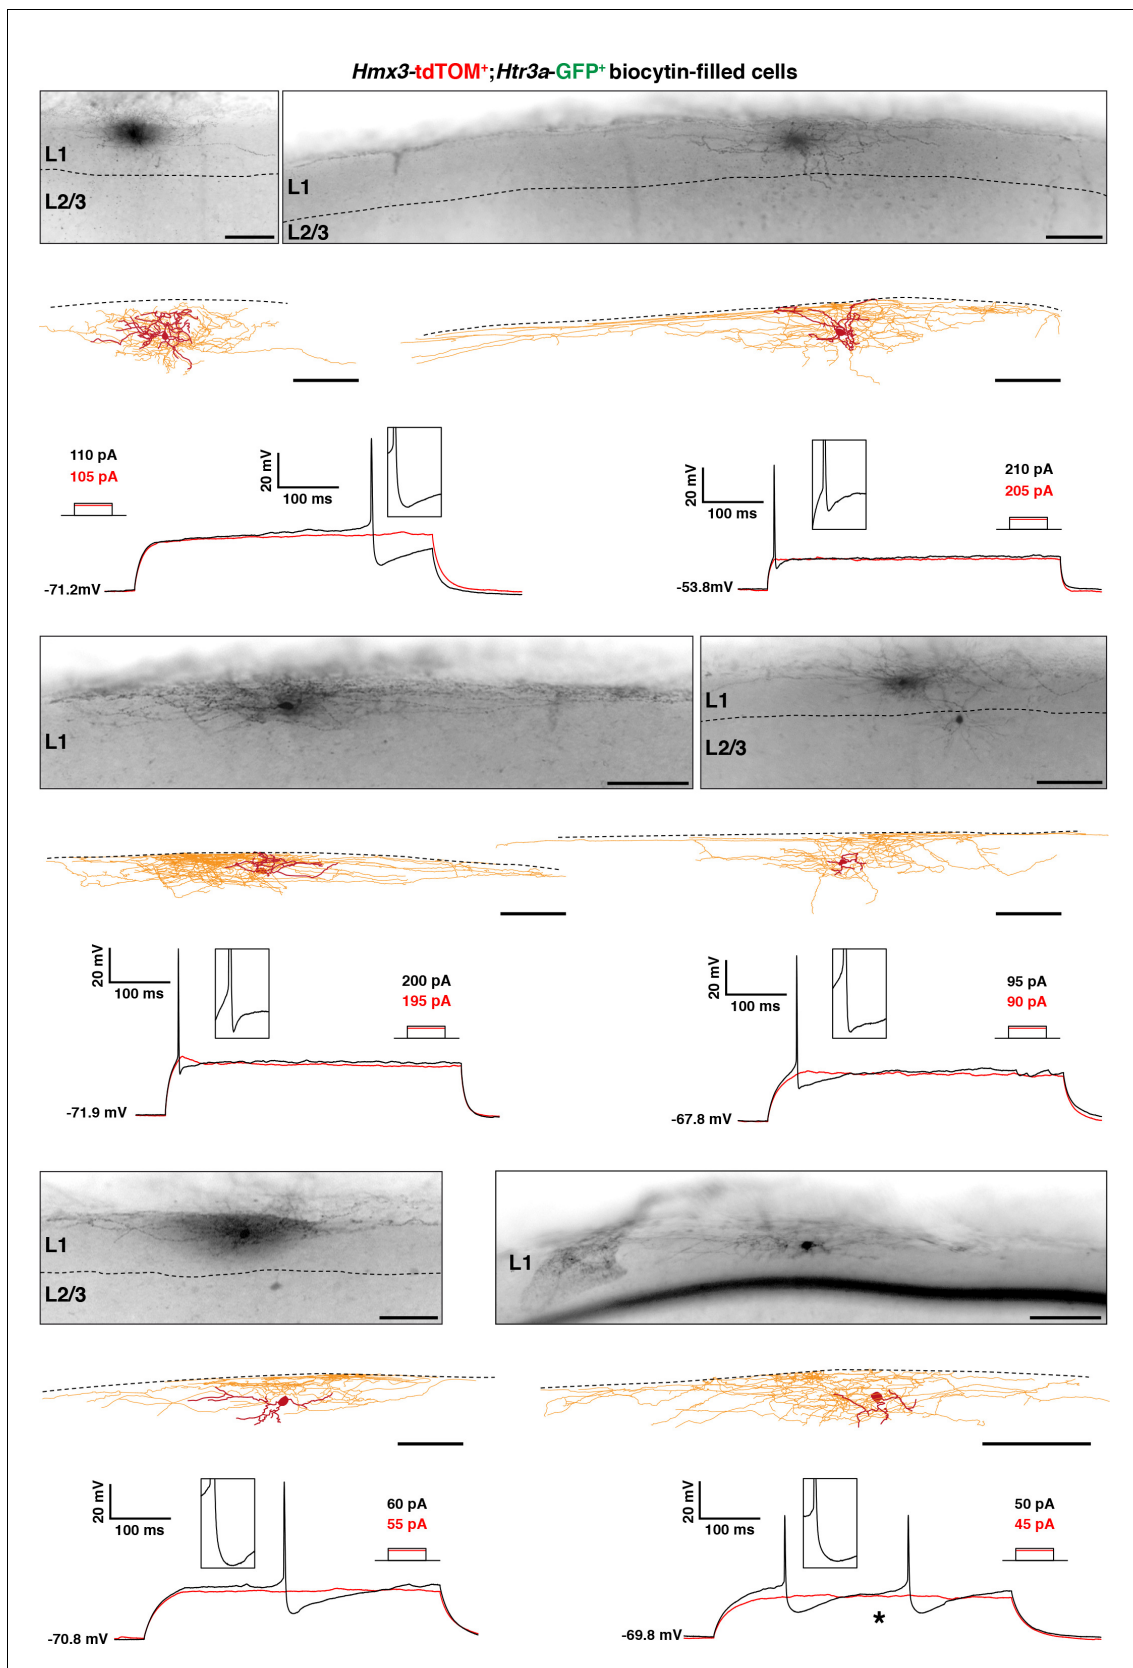

**Figure 6—figure supplement 1.** *Hmx3*; tdTOM<sup>+</sup>/*Htr3a*-GFP<sup>+</sup> interneurons (INs) in layer 1 (L1) display the characteristic morphology of elongated neurogliaform cells (eNGCs). Illustrative images confirming location of the cells, morphological reconstructions and electrophysiological traces of *Hmx3*; Figure 6—figure supplement 1 continued on next page



*Figure 6—figure supplement 1 continued*

tdTOM+/Htr3a-GFP+ INs in L1. All cells have the morphology of eNGCs with dense axonal ramifications mostly restricted to layer 1. One cell (\*) was excluded from the analysis of electrophysiological properties due to the presence of two peaks at the first 5 pA increment showing an action potential, but still its biocytin filling was good enough for morphological tracing (bottom right). Scale bars: 100  $\mu$ m in all brightfield images and reconstructions.

DOI: <https://doi.org/10.7554/eLife.32017.021>

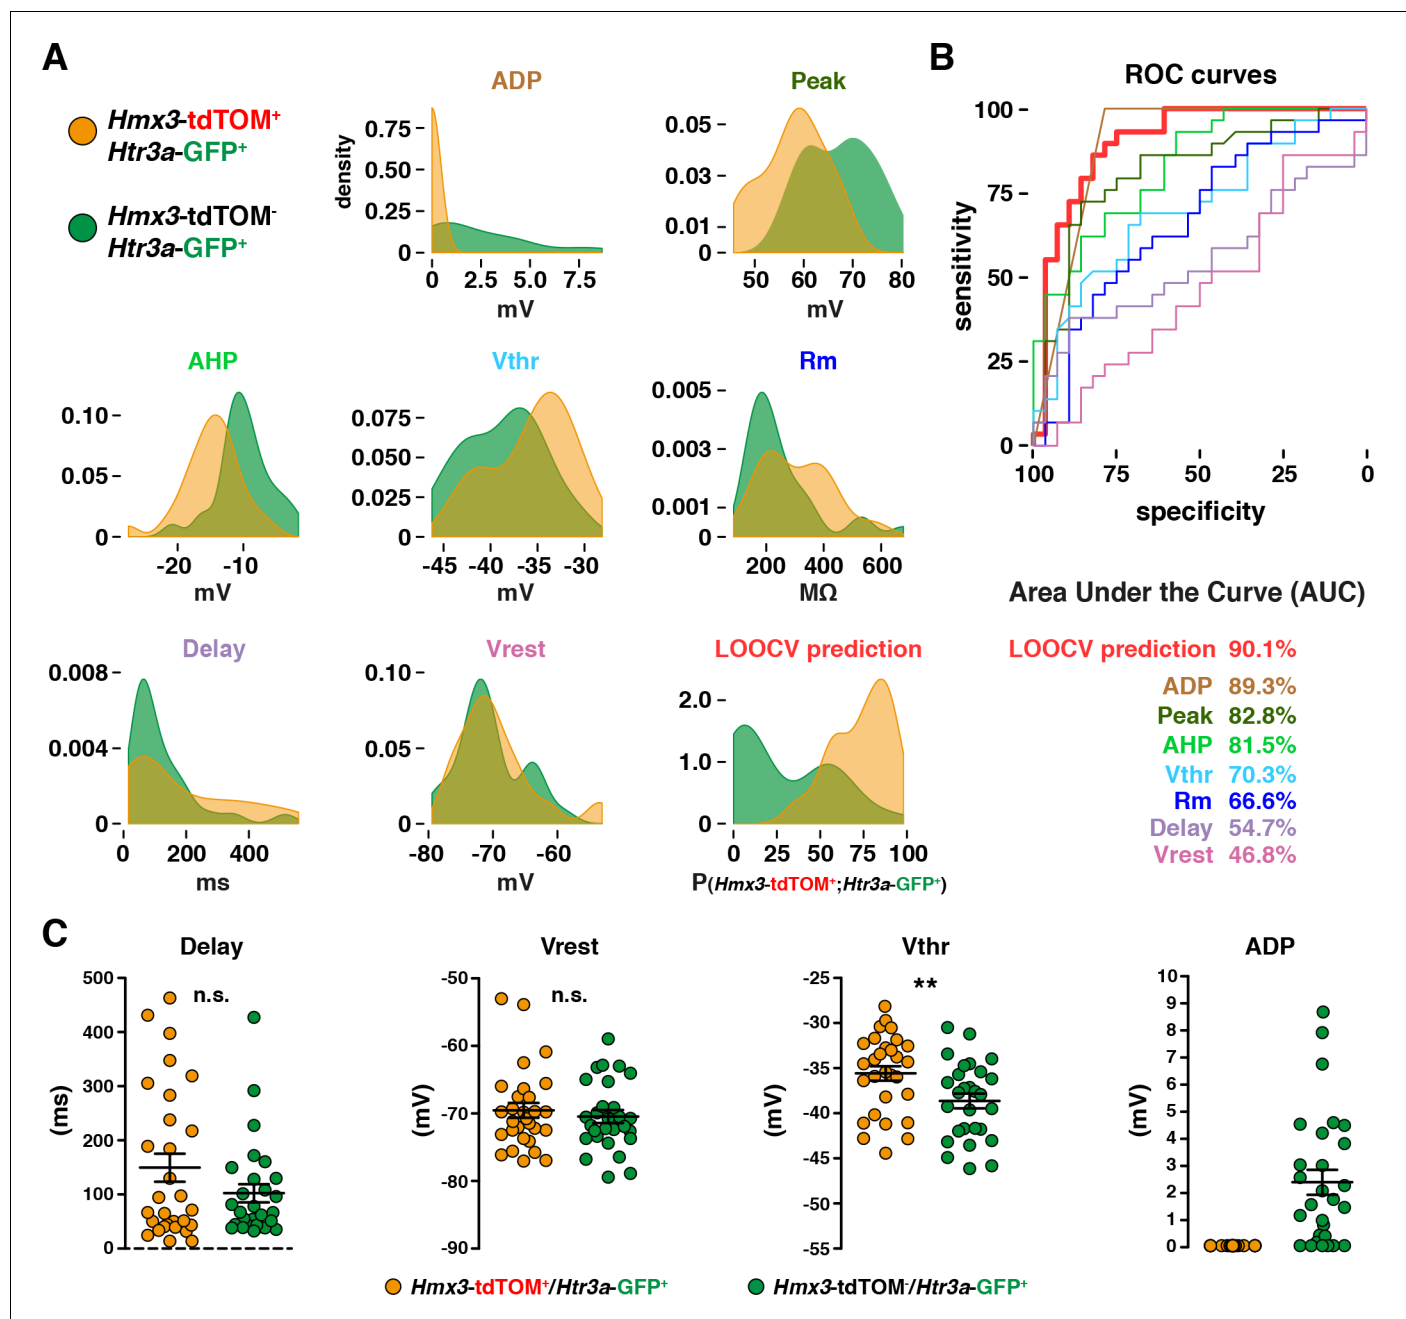

**Figure 6—figure supplement 2.** Prediction model parameters and electrophysiological features of *Hmx3*; *tdTOM*<sup>+</sup>/*Htr3a-GFP*<sup>+</sup> interneurons (INs) in layer 1. (A) Density plots of the electrophysiological values as well as of the LOOCV prediction probabilities for *Hmx3*-derived cells and non *Hmx3*-derived cells. (B) Receiver operating characteristic (ROC) curve for each electrophysiological property and on prediction probabilities obtained by LOOCV. (C) Significant difference is found between *Hmx3*-derived cells and non *Hmx3*-derived cells for threshold potential (*V*<sub>thr</sub>; \*\**p*=0.0097; unpaired t-test) but not for delay to the first action potential (Delay; *p*=0.55; Mann-Whitney test) and resting potential (*V*<sub>rest</sub>; *p*=0.68; Mann-Whitney test). Afterdepolarization potential (ADP) is 0 for all *Hmx3*-derived cells.

DOI: <https://doi.org/10.7554/eLife.32017.022>

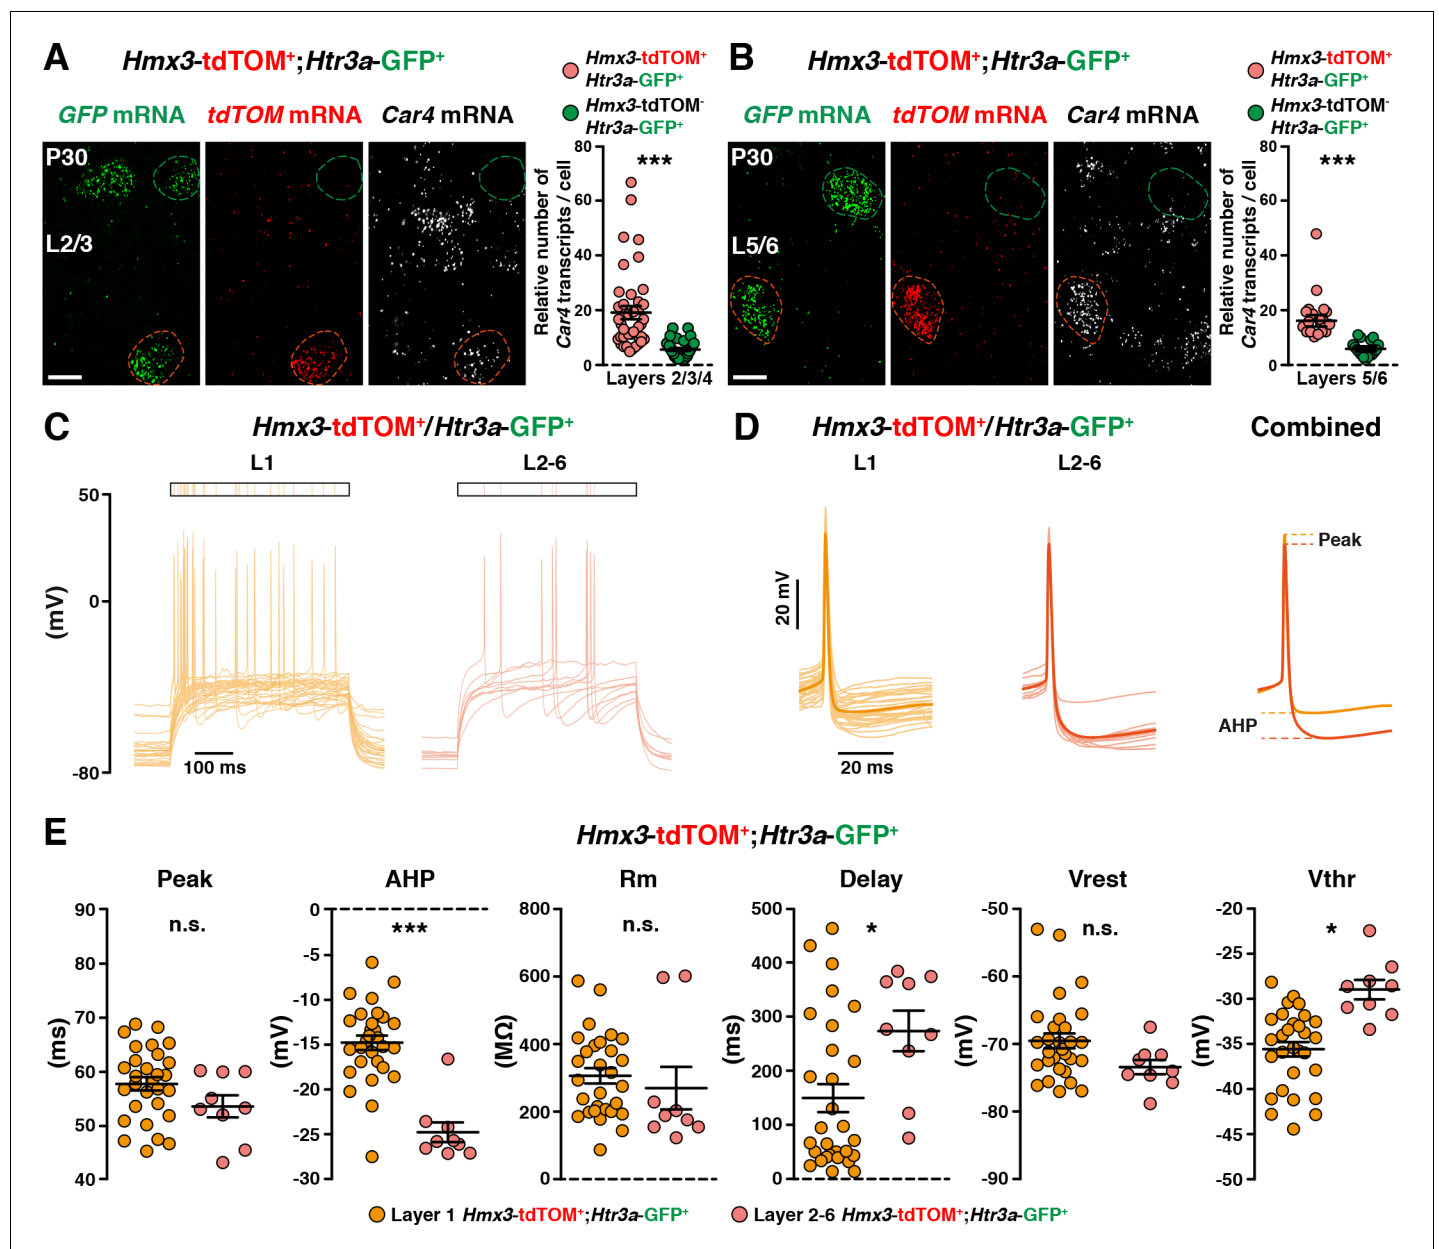

**Figure 6—figure supplement 3.** *Hmx3*; *tdTOM*<sup>+</sup>/*Htr3a-GFP*<sup>+</sup> interneurons (INs) in cortical layers 2–6 (L2–6) display molecular and electrophysiological properties of NGCs. (A, B) RNAscope multiplex fluorescent hybridization for *tdTOM*, *GFP* and *Car4* transcripts on P30 brains showing that *Hmx3*; *tdTOM*<sup>+</sup>/*Htr3a-GFP*<sup>+</sup> INs (red outline) express *Car4* at significantly higher levels in L2–4 (A, \*\*\**p*<0.0001; Mann-Whitney test) and L5/6 (B, \*\*\**p*<0.0001; Mann-Whitney test) as compared to *Htr3a-GFP*<sup>+</sup> INs negative for *tdTOM* (green outline). (C) Superimposed single AP traces at rheobase of *Hmx3*; *tdTOM*<sup>+</sup>/*Htr3a-GFP*<sup>+</sup> INs recorded in L1 (orange) and in L2–6 (red). *Hmx3*; *tdTOM*<sup>+</sup>/*Htr3a-GFP*<sup>+</sup> INs from L2–6 exhibit more late-spiking profile. (D) Same traces as in (C), aligned to the AP, in a lower time scale. Thin lines are individual cell traces and thick lines are trace averages. The average traces on the right are aligned to the threshold potential (*V*<sub>thr</sub>). (E) As compared to L1 cells, *Hmx3*; *tdTOM*<sup>+</sup>/*Htr3a-GFP*<sup>+</sup> INs in L2–6 display significant differences in afterhyperpolarization amplitude (AHP; \*\*\**p*=0.0001; Mann-Whitney test), delay to the first action potential (Delay; \**p*=0.0202; unpaired t-test) and *V*<sub>thr</sub> (\**p*=0.0002; unpaired t-test). No significant differences were found between *Hmx3*; *tdTOM*<sup>+</sup>/*Htr3a-GFP*<sup>+</sup> INs in L2–6 and L1 for peak amplitude (Peak; *p*>0.1058; unpaired t-test), membrane resistance (*R*<sub>m</sub>; *p*=0.5011; unpaired t-test) and resting potential (*V*<sub>rest</sub>; *p*=0.7056; unpaired t-test). Scale bars: 10 μm in all.

DOI: <https://doi.org/10.7554/eLife.32017.023>

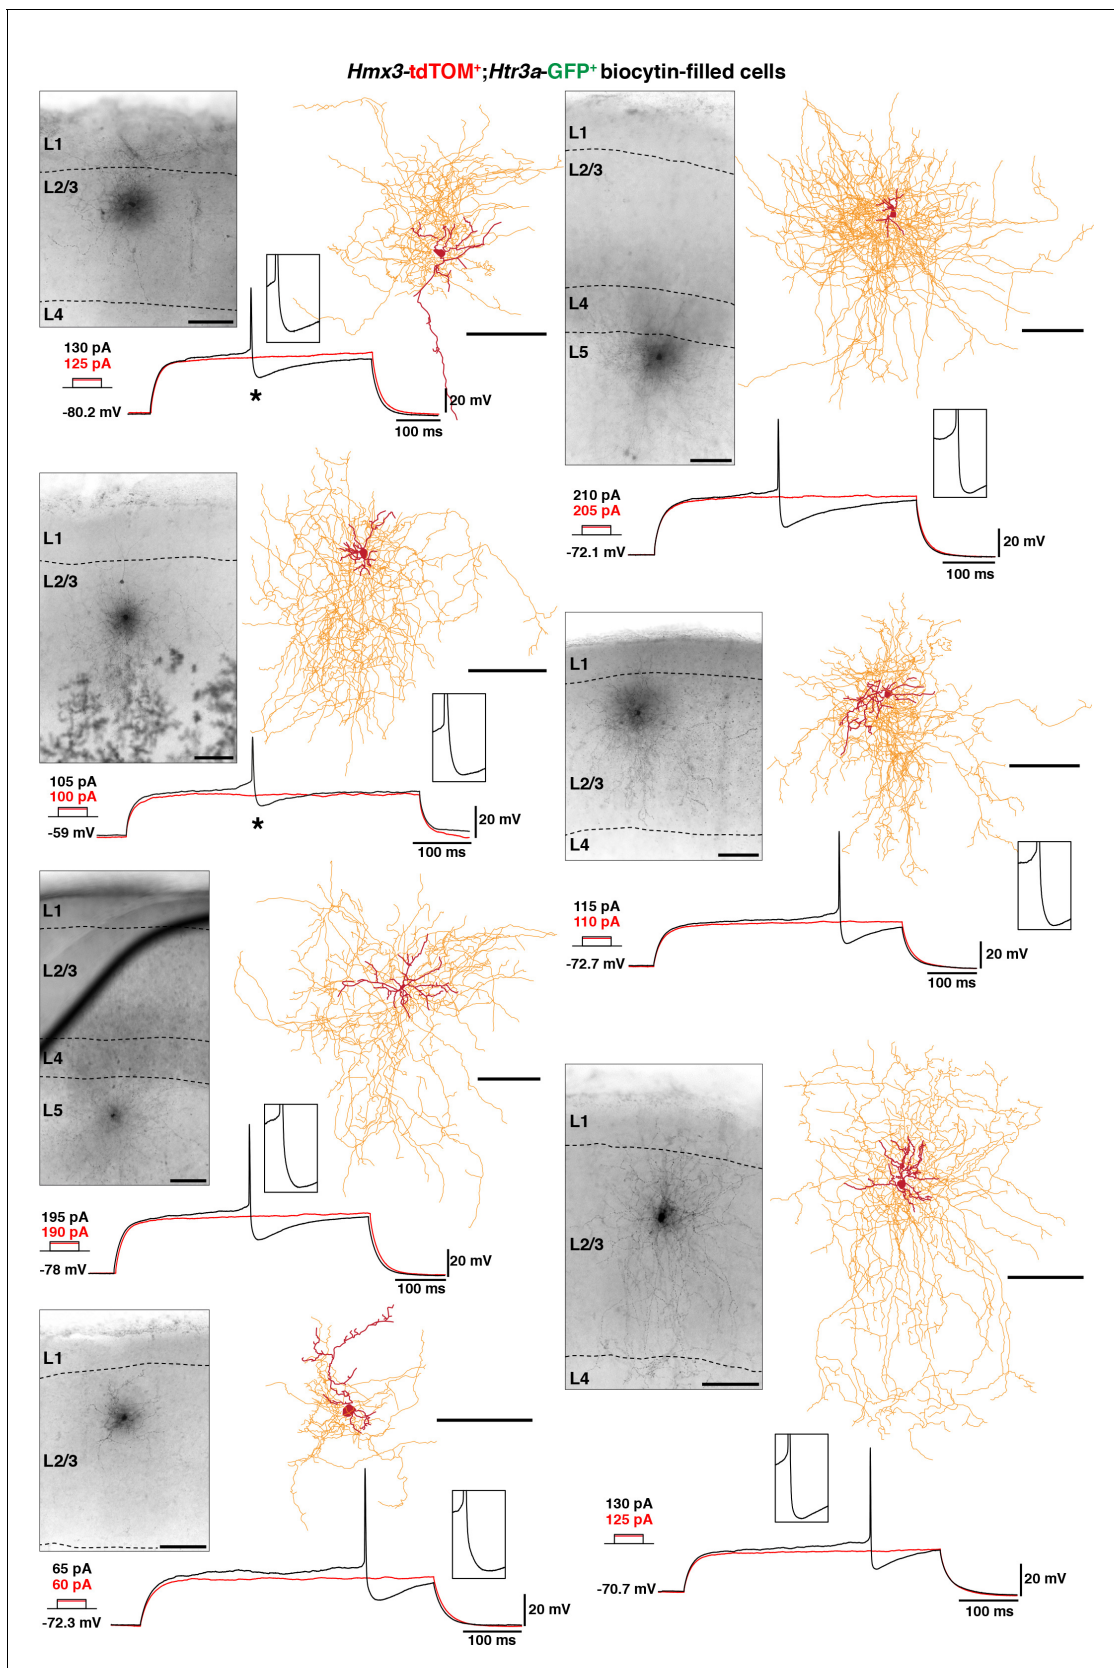

**Figure 6—figure supplement 4.** *Hmx3*; tdTOM<sup>+</sup>/*Htr3a*-GFP<sup>+</sup> interneurons (INs) in cortical layers 2–6 (L2–6) display the characteristic morphology of NGCs. Illustrative images confirming location of the cells, morphological reconstructions and electrophysiological traces of *Hmx3*; tdTOM<sup>+</sup>/*Htr3a*-GFP<sup>+</sup> Figure 6—figure supplement 4 continued on next page



Figure 6—figure supplement 4 continued

+ INs in L2–6. All cells have the morphology of NGCs with dense axonal ramifications extending throughout layers. Two cells (\*) were excluded from the analysis of electrophysiological properties due to high series resistance, but still their biocytin filling was good enough for morphological tracing (left, upper two panels). Scale bars: 100  $\mu$ m in all.

DOI: <https://doi.org/10.7554/eLife.32017.024>

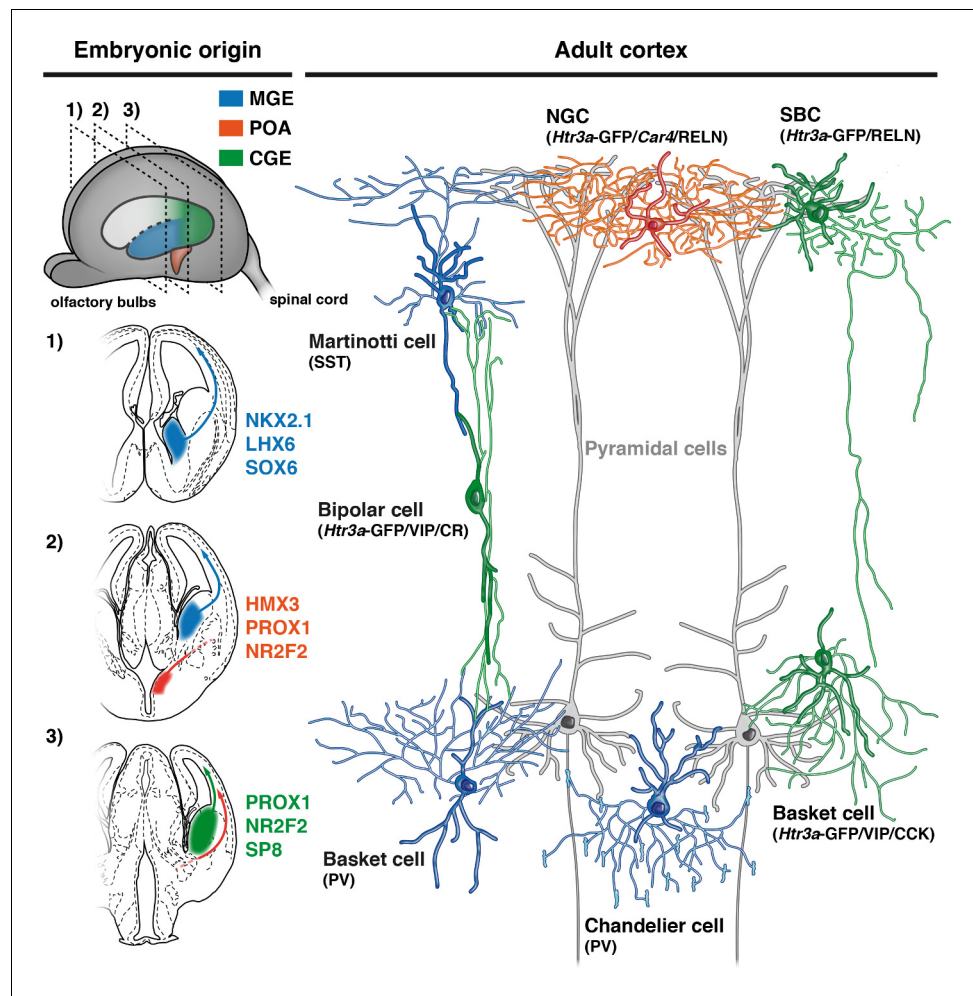

**Figure 7.** Developmental origin of cardinal classes of cortical interneurons. The Martinotti somatostatin (SST) cell, the parvalbumin (PV) basket cell and the PV+ chandelier cell originate from NKX2.1+ progenitors of the medial ganglionic eminence (MGE, blue) and rely on the transcription factors (TFs) LHX6 and SOX6. The *Htr3a-GFP/reelin* (RELN) single-bouquet cell (SBC), the *Htr3a-GFP/vasointestinal peptide* (VIP)/cholecystokinin (CCK) basket cell and the *Htr3a-GFP/VIP/calretinin* (CR) bipolar cell are derived from cells located in the caudal ganglionic eminence (CGE, green) that express the TFs PROX1, NR2F2 and SP8. The RELN/*Car4/Htr3a-GFP* neurogliaform cell (NGC) is specifically derived from *Hmx3*+ cells located in the preoptic area (POA, orange) and express the TFs PROX1 and NR2F2.

DOI: <https://doi.org/10.7554/eLife.32017.029>
